# Supplementary material for: Lung function in volunteers before and after exposure to trichloramine in indoor pool environments and asthma in a cohort of pool workers
Source: PubMed Central journal article supplement — BMJ Open. 2012 Oct 8;2(5):e000973. doi: 10.1136/bmjopen-2012-000973 (PMC3488741; doi:10.1136/bmjopen-2012-000973), 2012-10-08
Supplement: bmjopen-2012-000973.draft_revisions.pdf [file bmjopen-2012-000973.draft_revisions.pdf]

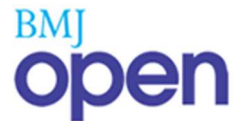

**Lung function in volunteers before and after exposure to trichloramine in indoor pool environments and asthma in a cohort of pool workers**

|                                 |                                                                                                                                                                                                                                                                                                                                                                                                                                                                                                                                                                                                                                                                                                                                                                                                                                                                                                                                                                                                                               |
|---------------------------------|-------------------------------------------------------------------------------------------------------------------------------------------------------------------------------------------------------------------------------------------------------------------------------------------------------------------------------------------------------------------------------------------------------------------------------------------------------------------------------------------------------------------------------------------------------------------------------------------------------------------------------------------------------------------------------------------------------------------------------------------------------------------------------------------------------------------------------------------------------------------------------------------------------------------------------------------------------------------------------------------------------------------------------|
| Journal:                        | <i>BMJ Open</i>                                                                                                                                                                                                                                                                                                                                                                                                                                                                                                                                                                                                                                                                                                                                                                                                                                                                                                                                                                                                               |
| Manuscript ID:                  | bmjopen-2012-000973                                                                                                                                                                                                                                                                                                                                                                                                                                                                                                                                                                                                                                                                                                                                                                                                                                                                                                                                                                                                           |
| Article Type:                   | Research                                                                                                                                                                                                                                                                                                                                                                                                                                                                                                                                                                                                                                                                                                                                                                                                                                                                                                                                                                                                                      |
| Date Submitted by the Author:   | 31-Mar-2012                                                                                                                                                                                                                                                                                                                                                                                                                                                                                                                                                                                                                                                                                                                                                                                                                                                                                                                                                                                                                   |
| Complete List of Authors:       | Nordberg, Gunnar; Umea University, Public Health and Clinical Medicine<br>Lundstrom, Nils-Goran; Umea University, Public Health and Clinical Medicine<br>Forsberg, Bertil; Umea University, Public Health and Clinical Medicine<br>Hagenbjork Gustafsson, Annika; Umea University, Public Health and Clinical Medicine<br>Lagerkvist, Birgitta; Umea University, Public Health and Clinical Medicine<br>Nilsson, Johan; Umea University, Public Health and Clinical Medicine<br>Svensson, Mona; Umea University, Public Health and Clinical Medicine<br>Blomberg, Anders; Umea University, Public Health and Clinical Medicine<br>Nilsson, Leif; Umea University, Mathematical Statistics<br>Bernard, Alfred; Universite Catholique de Louvain, Toxicology and Occupational Health<br>Dumont, Xavier; Universite Catholique de Louvain, Toxicology and Occupational Health<br>Bertilsson, Helen; Umea University, Public Health and Clinical Medicine<br>Eriksson, Kare; Umea University, Public Health and Clinical Medicine |
| <b>Primary Subject Heading</b>: | Respiratory medicine                                                                                                                                                                                                                                                                                                                                                                                                                                                                                                                                                                                                                                                                                                                                                                                                                                                                                                                                                                                                          |
| Secondary Subject Heading:      | Public health                                                                                                                                                                                                                                                                                                                                                                                                                                                                                                                                                                                                                                                                                                                                                                                                                                                                                                                                                                                                                 |
| Keywords:                       | PUBLIC HEALTH, RESPIRATORY MEDICINE (see Thoracic Medicine), OCCUPATIONAL & INDUSTRIAL MEDICINE                                                                                                                                                                                                                                                                                                                                                                                                                                                                                                                                                                                                                                                                                                                                                                                                                                                                                                                               |
|                                 |                                                                                                                                                                                                                                                                                                                                                                                                                                                                                                                                                                                                                                                                                                                                                                                                                                                                                                                                                                                                                               |

SCHOLARONE™  
Manuscripts

## LUNG FUNCTION and ASTHMA in POOL ENVIRONMENTS

20120331

**Lung function in volunteers before and after exposure to trichloramine in indoor pool environments and asthma in a cohort of pool workers**

G. Nordberg, N-G. Lundstrom, B. Forsberg, A. Hagenbjork-Gustafsson, B. J-son Lagerkvist, J. Nilsson, M. Svensson, A. Blomberg, L. Nilsson, A. Bernard, X. Dumont, H. Bertilsson and K. Eriksson

Address correspondence to G. Nordberg, Department of Public Health and Clinical Medicine, Umea University, SE-90187 Umea, Sweden. Telephone. +46 90 7852727. E-mail [gunnar.nordberg@envmed.umu.se](mailto:gunnar.nordberg@envmed.umu.se)

List of abbreviations:

- CC16: Clara Cell protein 16
- FEV<sub>1</sub>: Forced Expiratory Volume in 1 second, liters
- FEV<sub>%</sub>: FEV<sub>1</sub>x100/FVC
- FVC: Forced Vital Capacity, liter
- NCl<sub>3</sub>: Nitrogen trichloride or trichloramine
- OR: Odds Ratio
- RHINE: Respiratory Health in Northern Europe
- SPD: Surfactant protein D

## LUNG FUNCTION and ASTHMA in POOL ENVIRONMENTS

**Summary:****1) Article focus:**

# Exposure to trichloramine (NCl<sub>3</sub>) in swimming-pool air is known to cause mucous membrane and pulmonary effects, but statistically significant changes in lung function among adults have not been reported.

# Epidemiological studies of asthma among pool workers are not available.

**2) Key messages:**

# In this study we found for the first time, statistically significant decreases in lung function in volunteers after exposure to pool air with commonly occurring levels of NCl<sub>3</sub>.

# We found a tendency towards a higher odds ratio (OR) for asthma in a nested case reference study within a cohort of 1102 pool workers.

# Our findings support the notion that current workroom exposures of NCl<sub>3</sub> may contribute to asthma development.

**3) Strengths and limitations:** This is the first study showing small but statistically significant decreases in lung function after exposure to pool air. This is the first nested Case/Control study in pool workers. It reports an OR for asthma of 2.31 (95% CI 0.79-6.74) among pool workers with the highest exposure (after correction for heredity), but this finding did not reach statistical significance.

## LUNG FUNCTION and ASTHMA in POOL ENVIRONMENTS

**ABSTRACT**

**Objectives:** Exposure to trichloramine ( $\text{NCl}_3$ ) in indoor swimming pool environments is known to cause mucous membrane irritation, but if it gives rise to changes in lung function or asthma in adults is not known. 1: We determined lung function in volunteers before and after exposure to indoor pool environments 2: We studied the occurrence of respiratory symptoms and asthma in a cohort of pool workers.

**Design/Methods/Participants:** 1. We studied two groups of volunteers, 37 previously non-exposed healthy persons and 14 pool workers, who performed exercise for two hours in an indoor pool environment.  $\text{NCl}_3$  in air was measured during pool exposures and in 10 other pool environments. Filtered air exposures were used as controls. Lung function and biomarkers of pulmonary epithelial integrity were measured before and after exposure. 2. We mailed a questionnaire to 1741 persons who indicated in the Swedish census 1990 that they worked at indoor swimming-pools.

**Results:** 1. In previously non-exposed volunteers, statistically significant decreases in  $\text{FEV}_1$  and  $\text{FEV}_\%$  ( $p=0.01$  and  $p=0.05$  respectively) were found after exposure to pool air ( $0.23 \text{ mg/m}^3$  of  $\text{NCl}_3$ ). In pool workers, a statistically significant decrease in  $\text{FEV}_\%$  ( $p=0.003$ ) was seen after exposure to  $0.15 \text{ mg/m}^3$  of  $\text{NCl}_3$ . In the 10 other pool environments the median  $\text{NCl}_3$  concentration was  $0.18 \text{ mg/m}^3$ . 2. Our nested Case/Control study in pool workers found an OR for asthma of 2.31 (95% CI 0.79-6.74) among those with the highest exposure. Exposure-related acute mucous membrane and respiratory symptoms were also found..

**Conclusions:** This is the first study in adults showing statistically significant decreases in lung function after exposure to  $\text{NCl}_3$ . An increased OR for asthma among highly exposed pool workers did not reach statistical significance, but the combined evidence supports the notion that current workroom exposures may contribute to asthma development. Further research on sensitive groups is warranted.

## LUNG FUNCTION and ASTHMA in POOL ENVIRONMENTS

**INTRODUCTION and OBJECTIVES**

Mono-, di- and trichloramines are formed following a reaction between ammonia (NH<sub>3</sub>) or other nitrogen containing substances present in swimming pool water when hypochlorite is used as a disinfectant. Trichloramine (NCl<sub>3</sub>) is the most volatile chloramine and is emitted into the air of indoor swimming pools. Exposure to this substance was the suspected cause of outbreaks of short-incubation ocular and respiratory illness [1,2], but concentrations of NCl<sub>3</sub> in pool environments were not known in these outbreaks. It is known, however, that acute respiratory and eye symptoms may occur among recreational swimmers in relation to measured levels of NCl<sub>3</sub> in pool environments [3].

Only few and inconclusive studies have been performed on lung function among adults after exposures to measured levels of NCl<sub>3</sub> in pool environments [4,5] and additional studies are required.

Clara cell protein 16 (CC16) is an epithelial protective protein in peripheral lung tissue and changes in its serum levels are used as a biomarker of epithelial integrity [6]. It has been shown to be decreased in relation to frequency of pool attendance [7]. However, changes in serum levels of CC16 have not been studied after short term exposure to NCl<sub>3</sub>.

Thickett et al 2002 [8] reported three cases of occupational asthma among British pool workers exposed to NCl<sub>3</sub>. There is a lack of epidemiological studies on asthma among those working in swimming pool environments.

The objectives of the present study were 1. To perform a controlled human exposure study of lung function and biomarkers of pulmonary epithelial integrity in volunteers before and after

## LUNG FUNCTION and ASTHMA in POOL ENVIRONMENTS

1  
2  
3 exposure to indoor swimming pool environments. 2. To perform an epidemiological study of  
4  
5 self-reported asthma and subjective symptoms in a cohort of indoor swimming pool workers  
6  
7  
8  
9  
10

**DESIGN, MATERIALS AND METHODS****Air sampling and determination of  $\text{NCl}_3$ :*****Exposure measurements in human exposure study***

11  
12  
13  
14  
15  
16  
17  
18  
19  
20  
21 In the two pool environments where our study of volunteers and pool-workers took place  
22  
23 hypochlorite was used as disinfectant. Air samples were collected in the breathing zone: one  
24  
25 sample for each 2-hour exposure, in total 51 samples.  
26  
27  
28  
29

***Determination of  $\text{NCl}_3$  at other indoor swimming pools:***

30  
31  
32 Additional determinations of  $\text{NCl}_3$  were performed 2004-2008 at 10 different pool  
33  
34 establishments (7 conventional ones and 3 “adventure water lands”) in northern Sweden with  
35  
36 totally 30 indoor pools. Hypochlorite was used as disinfectant. At each swimming-pool, air  
37  
38 was sampled during 3 hours at 3 to 4 different locations in close vicinity of the pool. The  
39  
40 equipment was mounted on a stand with the filter at a height of approximately 1.5 meter.  
41  
42 Sampling was performed on three different days during winter and three different days during  
43  
44 summer.  
45  
46  
47  
48  
49

50  
51 ***Air collection and Analysis:*** 1L/min of air was pumped through a filter (quartz filter QM-A  
52  
53 37 mm Whatman International Ltd., Maidstone, England). The filter was soaked in a solution  
54  
55 of sodium carbonate and arsenic trioxide ( $\text{AsO}_3$ ) and dried as presented earlier [9]. When  
56  
57  $\text{NCl}_3$  is collected on the filter it is reduced to chloride ion ( $\text{Cl}^-$ ) [9]. After sampling, the filters  
58  
59  
60

## LUNG FUNCTION and ASTHMA in POOL ENVIRONMENTS

1  
2  
3 were extracted with 10 ml of ultra-pure water, shaken for 30 minutes and filtered through a 13  
4  
5 mm syringe filter (IC Acrodisc®, PALL). The chlorides were analyzed in a suppressed ion  
6  
7 chromatography system (Triatlon 900 autosampler, Spark, The Netherlands); ICSep AN1,  
8  
9 Anion column (CETAC, Omaha, USA); SCX membrane suppressor column (Sequant, Umeå,  
10  
11 Sweden); JD-21 conductivity detector (Costech Microanalytical Ltd, Tallin, Estonia)). The  
12  
13 eluent was 7.5 mM NaOH and the suppressor 5 mM H<sub>2</sub>SO<sub>4</sub>. Control samples of two known  
14  
15 chloride concentrations (0.5, 3.0 mg l<sup>-1</sup>) and at least two blanks were run together with the  
16  
17 samples in each run. The chloride concentrations in the blanks were subtracted from the  
18  
19 concentration in the samples. The detection limits of NCl<sub>3</sub> (1.78 and 1.18 µg m<sup>-3</sup> for 2 h and 3  
20  
21 h samplings, respectively) were determined as three times the mean standard deviation of the  
22  
23 amount collected on filters of 10 blanks. The limits of quantification (5.9 µg m<sup>-3</sup> and 3.9 µg m<sup>-3</sup>  
24  
25 for 2 h and 3 h samplings respectively) were determined as ten times the mean standard  
26  
27 deviation for the same blanks.  
28  
29  
30  
31  
32  
33  
34  
35

## Human exposure study

### Study groups:

36  
37  
38  
39  
40  
41 Group A: 37 healthy subjects (20 men and 17 women, mean age 24.5 years). They were not  
42  
43 regular swimming pool visitors and they had not visited a swimming pool within four weeks  
44  
45 before study start.  
46

47  
48 Group B: 14 workers at swimming pools (5 men, 9 women, mean age 39.9 years).  
49  
50

51  
52 All participants were non-smokers with normal lung function and had no history of allergy or  
53  
54 pre-existing lung disease. Subjects were free of airway infection for ≥4 weeks prior to the first  
55  
56 exposure and throughout the remainder of the study.  
57  
58  
59  
60

## LUNG FUNCTION and ASTHMA in POOL ENVIRONMENTS

**Study design**

The study was conducted in a crossover control fashion. Each volunteer was exposed to filtered air in an exposure chamber and on another occasion to an indoor pool environment. In the exposure chamber, located in a separate building away from swimming-pools, incoming air was adjusted to room temperature and filtered through a particle filter. The exposures were performed in random order. Successive exposures were separated by  $\geq 2$  weeks. The exposures (pool environment or filtered air) lasted for 2 hours. The study subject was exercising on a bicycle ergometer with moderate exercise (minute ventilation  $20 \text{ L}\cdot\text{min}^{-1}\cdot\text{m}^{-2}$ ), during 15-minutes followed by 15 minutes of rest, i.e. four periods of exercise and four periods of rest.

**Lung function:**

FVC and forced expiratory volume in 1 sec ( $\text{FEV}_1$ ) was determined using a portable spirometer connected to a computer (KoKo Spirometer and KoKo DigiDoser; Pulmonary Data Service Instrumentation, Inc, Louisville, KY, USA), calibrated in the morning and after every 10<sup>th</sup> measurement.  $\text{FEV}_\%$  was calculated as a percentage of FVC ( $\text{FEV}_\% = \text{FEV}_1 \times 100 / \text{FVC}$ ). Lung function was measured immediately before and after exposure in a room with non-detectable levels of  $\text{NCl}_3$  ( $< 0.002 \text{ mg NCl}_3/\text{m}^3$ ) or in a room adjacent to the exposure chamber.

**Blood sampling and determination of biomarkers.**

We obtained blood samples from the antecubital vein at 0 h and 2 h, i.e. before and after exposure, and at 4, 6 and 8 hours. Peripheral blood was collected into BD Vacutainer tubes (BD, Plymouth, UK). Each sample was allowed to clot for 1-2 h at room temperature, centrifuged at  $3,000 \times g$  and serum was transferred to cryotubes and frozen at  $-80^\circ\text{C}$ . These samples were sent to the Industrial Toxicology Unit at the Catholic University of Louvain in Brussels (IUTUCL), Belgium for determination of Clara Cell protein 16 (CC16) and



## LUNG FUNCTION and ASTHMA in POOL ENVIRONMENTS

1  
2  
3 Surfactant Protein D (SPD). CC16 was determined by latex immunoassay using a rabbit anti-  
4  
5 CC16 antibody (Dakopatts, Glostrup, Denmark) and CC16 purified at (IUTUCL) as standards  
6  
7 [10,11]. All samples were run in duplicate at two different dilutions. The between- and within-  
8  
9 run coefficients of variation range 5–10% and results are comparable with ELISA methods  
10  
11 [12]. SPD determinations were performed using the Biovendor ELISA kit (Biovendor,  
12  
13 Heidelberg, Germany). Analyses were done in duplicate as recommended by the  
14  
15 manufacturer.

16  
17  
18  
19 Total IgE was determined in human serum by a double antibody sandwich ELISA method  
20  
21 (Human IgE ELISA kit, Immunology Consultants Lab; Inc, Newberg, OR). The quantity of  
22  
23 IgE in the samples was interpolated from a standard curve.  
24  
25  
26  
27  
28  
29  
30

**Statistical analyses**

31  
32  
33 All data from CC16 measurements were corrected for diurnal variation according to Helleday  
34  
35 et al 2006 [13] and recalculated to correspond to 7 AM.  $CC16(\text{corr}) = CC16 + 0.582 * T -$   
36  
37  $0.032 * T^2$ . T is the time after 7.00 AM when the blood sample was taken. Because CC16  
38  
39 values are highest in the morning [13], corrected CC16 values were somewhat greater than  
40  
41 measured values.

42  
43  
44 Statistics: We used repeated measures analyses of variance (Huynh-Feldt corrected) with time  
45  
46 and exposure as within-subject factors and group as between-subject factor. Paired t-test or  
47  
48 Wilcoxon signed rank test was used when comparing exposures to filtered air and pool  
49  
50 environment at baseline (0 hrs) and after exercise (2h). Median IgE values were compared by  
51  
52 the Westenberg-Mood median test. SPSS version 17.0 was used to perform the statistical  
53  
54 analyses. A p-value of 0.05 was considered statistically significant.  
55  
56  
57  
58  
59  
60

## LUNG FUNCTION and ASTHMA in POOL ENVIRONMENTS

**Epidemiological study*****Population:***

The epidemiological study group included 1741 persons in the Swedish Census of Population and Housing 1990 who had indicated that they worked at swimming pools. Early 2007 a questionnaire was mailed to them. There was one reminder.

***Questionnaire:*** Questions dealt with time periods in various jobs, time spent in swimming pool environments, various symptoms from the respiratory tract and mucous membranes of the eyes and possible use of medication for asthma. 589 women and 513 men, age 30 ->80 years responded. Among 50 non-responders, interviews were performed via telephone. There was a lower prevalence of asthma and respiratory symptoms among the non-responders, not statistically significant.

In a nested case-control study within this cohort, 44 cases of self reported asthma occurred after the person was hired as a pool worker. 128 age and sex matched controls were selected within the cohort.

***Exposure assessment:***

Based on information on work titles given by each individual, exposure was classified into three different categories; 0, 1, or 2. 0 stands for no exposure, 1 for low exposure and 2 for high exposure. The exposure level is not an estimate of the concentration of  $\text{NCl}_3$  in air but is based on the average time during a workday the individual spent in the pool area. Those within category 0 did not spend any time in a pool area, e.g. a cashier. A person within category 1 did occasionally spend some time in the pool area. A manager of a swimming pool or a technician belongs to this category. Individuals belonging to category 2 were those

## LUNG FUNCTION and ASTHMA in POOL ENVIRONMENTS

1  
2  
3 spending most of the workday in the pool area, e.g. a swimming teacher, or a swimming pool  
4  
5 worker.  
6  
7  
8  
9

**Comparison data**

10  
11  
12 We obtained data on asthma in 1990 from the study “Respiratory Health in Northern Europe”  
13  
14 (RHINE [14]) via one of the authors of the present paper (BF). As we used the same questions  
15  
16 in the present study as in RHINE, it was possible to derive adequate sex and age stratified  
17  
18 comparison data up to the age of 55.  
19  
20  
21  
22  
23

**Statistics**

24  
25  
26  
27  
28 Fisher’s test was used to test differences between proportions. Conditional logistic regression  
29  
30 was used for analyses in the nested case-control study and logistic regression for analyses of  
31  
32 asthma in relation to years worked in swimming-pool environments. All statistical analyses  
33  
34 were performed using the statistical package R, version 2.9.0 ( [www.r-project.org](http://www.r-project.org)). P-values  
35  
36 equal or less than 0.05 were considered statistically significant.  
37  
38  
39  
40  
41  
42

**Ethics**

43  
44  
45  
46 The project was approved by the Regional ethical review board in Umea, Sweden (Dnr 05-  
47  
48 044M) and volunteers provided written informed consent. The study was carried out  
49  
50 according to the declaration of Helsinki.  
51  
52  
53  
54

**RESULTS****Air sampling.**

## LUNG FUNCTION and ASTHMA in POOL ENVIRONMENTS

***Experimental exposure (Human exposure study)***

The NCl<sub>3</sub> levels during the experimental exposures were

Group A: Mean 0.23 mg/m<sup>3</sup> (SD 0.09)

Group B Mean 0.15 mg/m<sup>3</sup> (SD 0.04)

***Other Swimming pools***

NCl<sub>3</sub> concentrations in air at the 10 different indoor swimming pool establishments were between 0.001- 0.77 mg/m<sup>3</sup>, median 0.18 mg/m<sup>3</sup>, arithmetic mean (AM) 0.21 mg/m<sup>3</sup> (n=129). The AM concentrations of NCl<sub>3</sub> in each of the ten different pool establishments were between 0.09 – 0.32 mg/m<sup>3</sup>. There was no difference in NCl<sub>3</sub> concentrations during summer compared with winter conditions (results not shown).

**Human exposure study*****Lung function***

Group A:

Measured FEV<sub>1</sub> volumes among healthy volunteers as well as the difference before and after 2 hours of exposure to pool environment or filtered air are summarized in Table 1. There was a small, statistically significant decrease (p=0.01) in FEV<sub>1</sub> (mean decrease = 0.05 L) after exposure to swimming pool air. After exposure to filtered air there was a slight, not statistically significant increase in FEV<sub>1</sub> (mean increase 0.01 L). When comparing the differences (Δ-values) in FEV<sub>1</sub> before and after exposure to pool environment with the Δ-values for exposure to filtered air in the same individuals, the difference between Δ-values was statistically significant (p=0.01).

FEV<sub>%</sub> values among healthy volunteers are also given in table 1. After exposure to pool air, there was a small decrease (0.8 FEV<sub>%</sub>) that was marginally statistically significant (p=0.05).

## LUNG FUNCTION and ASTHMA in POOL ENVIRONMENTS

1  
2  
3 After exposure to filtered air, there was a small (statistically non-significant) increase in  
4  
5 FEV<sub>%</sub> values. When the individual differences ( $\Delta$ -values) of FEV<sub>%</sub> before and after exposure  
6  
7 to pool air were compared with the corresponding  $\Delta$ -values in filtered air, a statistically  
8  
9 significant difference was demonstrated ( $p=0.004$ , paired t-test). Airway obstruction is usually  
10  
11 defined as FEV<sub>%</sub> below 70 ([www.goldcopd.com](http://www.goldcopd.com)). Only one value was below 70 (after  
12  
13 exposure) among the healthy volunteers.  
14

## Group B

15  
16  
17  
18 In table 2, FEV<sub>1</sub> values for the swimming-pool workers are summarized. After exposure to  
19  
20 pool air there was a small and not statistically significant decrease in FEV<sub>1</sub>, 0.01 L. There was  
21  
22 also a small decrease in FEV<sub>1</sub> after exposure to filtered air (0.05 L,  $p=0.054$ ). When  
23  
24 considering the FEV<sub>%</sub> values for the workers (Table 2) before and after exposure to pool air,  
25  
26 there was a statistically significant decrease of 1.36% ( $p=0.003$ ). After exposure to filtered air  
27  
28 the small decrease in FEV<sub>%</sub> of 0.43% was not statistically significant. Only two FEV<sub>%</sub> values  
29  
30 among the pool workers (one before and one after exposure) were below 70.  
31  
32  
33  
34  
35  
36  
37

***Biomarkers of pulmonary epithelial integrity:***

## Group A

38  
39  
40  
41  
42 Mean CC16corr values and related standard deviations (SD) in previously unexposed healthy  
43  
44 volunteers, are shown in Figure 1 for 33 of the participants in group A. For the remaining 4  
45  
46 persons, values were missing and they were therefore excluded from analysis.  
47

48  
49 At baseline (0 hrs), mean CC16corr = 12.6  $\mu\text{g/L}$  before pool exp (0 h) and 10.3  $\mu\text{g/L}$   
50  
51 immediately before (0 h) exposure to filtered air. This difference ( $p=0.018$ , paired t-test) is  
52  
53 difficult to explain because the same volunteers were exposed to both pool environment and  
54  
55 filtered air and they were randomly assigned to either exposure.  
56  
57  
58  
59  
60

## LUNG FUNCTION and ASTHMA in POOL ENVIRONMENTS

## Group B

Results are shown in Table 1. The mean CC16corr was 6.5 µg/L before both pool and filtered air exposures.

The difference between groups A and B persisted during and after exposure (0-8 hrs) and is statistically significant ( $p < 0.001$  repeated measures analysis of variance on log transformed data). There is also a different change with time. Group A decreases with time and group B increases with time. The difference in trend is statistically significant  $p = 0.038$ .

The decrease with time in group A during and after exposure to pool environment as well as filtered air is statistically significant ( $p < 0.05$ , GLM repeated analysis model). There is no statistically significant difference in change with time between pool exposure and filtered air.

For improved analysis, values were converted to their natural logarithms, SDs decreased, providing improved statistical conditions, but no statistically significant effect of exposure could be shown (data not shown).

SPD values, shown in Figure 2, also display a change with time, with lower values with increasing time intervals from initiation of exposure. Considering the log transformed SPD variable, there was a difference ( $p < 0.05$ ) before and after exposure (i.e. SPD values were higher at 0 hrs than at 2 hrs) and there was a further decrease ( $p < 0.01$ ) with time at 2 hrs – 8 hrs (Figure 2). This decrease was similar for exposure to pool air and filtered air. We found no statistically significant changes in SPD values in relation to exposure.

## IgE

## LUNG FUNCTION and ASTHMA in POOL ENVIRONMENTS

1  
2  
3 The median IgE value was 1.0 mg/L in Group A and 0.0 in group B, compared to 3.0 mg/L in  
4  
5 mild asthmatics (n=18) participating in another study on influence of general air pollution  
6  
7 conducted by one of the authors (BF). Compared to the volunteers in the present study  
8  
9 (groups A and B), the median value of the asthmatics was statistically significantly higher (p=  
10  
11 0.002) based on Westenber-Mood median test.  
12  
13

**Epidemiological study**

14  
15  
16  
17  
18 There was a statistically significant relationship between the number of hours, during an  
19  
20 average day, spent in the swimming pool environment and the incidence of acute symptoms  
21  
22 (p<0.01; logistic regression). Frequent symptoms were: dyspnoea (13%), cough (23%), nose  
23  
24 irritation (29%), throat irritation (24%) and eye irritation (37%).  
25  
26  
27

28  
29  
30 The prevalence of self reported asthma attacks or medication for asthma was higher (p<0.01;  
31  
32 Fisher's test) among swimming pool workers in this study (12.3%) compared with the  
33  
34 reference group 8,1% (RHINE 1999). When considering rates (age and sex adjusted) by  
35  
36 logistic regression, there was still a higher prevalence among swimming-pool workers, but  
37  
38 less significant (p=0.11).  
39  
40  
41

42  
43 In the nested case-control study, the Odds Ratio (OR) for asthma was 2.53 (95% CI 0.89 –  
44  
45 7.19) for persons with exposure level 2 compared with persons exposed to level 0 or 1. After  
46  
47 correction for heredity, the corresponding numbers were: OR 2.31 (95%CI 0.79-6.74).  
48

49 These values refer to cases of self reported asthma occurring after they started pool work,  
50  
51 compared with controls.  
52  
53  
54  
55  
56  
57  
58  
59  
60

## LUNG FUNCTION and ASTHMA in POOL ENVIRONMENTS

1  
2  
3 A tendency to a reduced risk of developing asthma in relation to the number of years of work  
4  
5 in swimming-pool environments was indicated among individuals who worked more than one  
6  
7 year and developed asthma after they started to work in such environments. This tendency  
8  
9 was, however not, statistically significant  $p=0.07$ .  
10

**Discussion**

11  
12  
13  
14  
15  
16 Our observations of statistically significant decreases in  $FEV_1$  and  $FEV\%$  in previously non-  
17  
18 exposed volunteers and pool workers after exposure to pool air are the first such observations  
19  
20 in adults. Carbonelle et al 2002 [4] reported an increase in  $FEV_1/VC$  among children and a  
21  
22 non-statistically significant decrease in adults ( $n=13$ ) after they had attended a chlorinated  
23  
24 pool. Carbonelle et al 2008 [4] found  $FEV_1/VC$  to be unchanged in 11 young adults after  
25  
26 swimming in a non-chlorinated pool and slightly, but not statistically significantly decreased  
27  
28 after swimming in a chlorinated pool. The lack of statistically significant decrease may be  
29  
30 related to the fact that only 11 adults were studied[4], while the statistically significant  
31  
32 decrease in our study was based on 37 previously unexposed healthy volunteers. Very few  
33  
34  $FEV\%$  values were below 70 (indicating no clinically significant airway obstruction within  
35  
36 the study group). The reduction in  $FEV\%$  seen after exposure in pool air here, albeit small,  
37  
38 may be a sign of an obstructive airway effect. In children, Bernard et al 2003 [14] found a  
39  
40 statistically highly significant relationship between cumulative pool attendance during  
41  
42 kindergarten and PEF 15 (post exercise reduction of peak expiratory flow by 15 percent),  
43  
44 providing supportive evidence of airway effects of exposure to chlorinated pool  
45  
46 environments. .  
47  
48  
49  
50

51  
52  
53  
54 CC16 levels in serum increase when lung epithelium permeability is adversely affected by air  
55  
56 pollutants or other lung toxicants [6, 10,15, 16]. On the other hand, reduced levels of CC16 in  
57  
58  
59  
60



## LUNG FUNCTION and ASTHMA in POOL ENVIRONMENTS

1  
2  
3 lung lavage fluid occur in several lung disorders, probably due to a decrease in the production  
4  
5 of CC16 as a consequence of a depletion of Clara cells [17]. We found a statistically  
6  
7 significant difference in the serum level of CC16 between pool workers compared to  
8  
9 volunteers. This finding is consistent with our previous finding of a lower CC16 value in  
10  
11 school children frequently attending indoor swimming pools than in those with a low  
12  
13 attendance at such pools [5]. The difference between workers and previously unexposed  
14  
15 healthy volunteers like the difference among school children may be due to a depletion of  
16  
17 Clara cells. We did not find any statistically significant exposure-related changes in  
18  
19 concentrations of the biomarkers of pulmonary epithelial integrity (CC16 and SPD) after  
20  
21 exposure to pool air for 2 hours. The lack of such an exposure-related change was probably  
22  
23 due to the relatively short exposure duration and low exposure level of  $\text{NCl}_3$ . Another possible  
24  
25 explanation is that  $\text{NCl}_3$  acts preferentially in the more proximal parts of the respiratory tract,  
26  
27 inducing a mild constriction of the central airways, but with less interference in the terminal  
28  
29 bronchioles, where the Clara cells are located. In previous studies of volunteers exposed to  
30  
31 ozone [6], we found both a decrease in  $\text{FEV}_1$  and an increase in serum CC16 concentrations  
32  
33 after exposure.  
34  
35  
36  
37  
38  
39

40 All CC16 values in the present study were corrected for diurnal variation [12]. In spite of such  
41  
42 correction, there was a statistically significant decrease with time of experiment from 0 h to 8  
43  
44 h in group A (regardless of exposure to  $\text{NCl}_3$ ). This indicates that the real diurnal variation  
45  
46 exceeded the one assumed in the employed correction calculation. For group B there is an  
47  
48 opposite trend with time, possibly related to an inadequate correction of the values in this  
49  
50 group. The pool workers were older and had been more exposed to  $\text{NCl}_3$  during many years of  
51  
52 work in pool environments. Data on diurnal variation for SPD are not available in the  
53  
54  
55  
56  
57  
58  
59  
60

## LUNG FUNCTION and ASTHMA in POOL ENVIRONMENTS

1  
2  
3 literature. Our data, with a statistically significant decrease with time between 0 h and 8 h,  
4  
5 indicate that a diurnal variation exists.

6  
7 The absence of exposure-related effects (after 2 hours exposure) on serum concentrations of  
8  
9 CC16 and SPD in combination with small, statistically significant decreases in FEV<sub>1</sub> and  
10  
11 FEV<sub>%</sub> show that the 2-hour exposure level in this experiment can be regarded as the Lowest-  
12  
13 Observed-Adverse-Effect-Level on the lung for this group of volunteers. It should be borne  
14  
15 in mind that individuals with increased sensitivity to adverse respiratory effects, like those  
16  
17 with pre-existing asthma, were not included in the present study. Our observation may be of  
18  
19 use in relation to administrative action in setting exposure limits for NCl<sub>3</sub>. To our knowledge,  
20  
21 no health-based limit values for occupational or environmental exposures have yet been set  
22  
23 for NCl<sub>3</sub>. A technical value of 0.2 mg/m<sup>3</sup> was recently recommended in Germany [18].  
24  
25 Bernard et al 2006 [19] showed that serum total IgE was a factor determining the risk of  
26  
27 adverse pulmonary effects after exposure to pool environments. Serum levels of total IgE in  
28  
29 the volunteers and workers of our study were lower than among mild asthmatics. The absence  
30  
31 of an increased level of total serum IgE among the present volunteers indicates that  
32  
33 individuals with possibly increased sensitivity due to increased IgE had been successfully  
34  
35 excluded. Further studies on persons with elevated serum IgE would be of interest. Another  
36  
37 group that may suffer respiratory effects at lower air concentrations of NCl<sub>3</sub> is competitive  
38  
39 swimmers because their breathing volumes exceed those of the volunteers in the present  
40  
41 study. Helenius et al 1998 [20] found increased respiratory symptoms and bronchial  
42  
43 responsiveness in elite swimmers.  
44  
45  
46  
47  
48

49  
50  
51 Our study indicates that employees in Swedish indoor pools are exposed to approximately the  
52  
53 same level of NCl<sub>3</sub> as employees in France and Belgium. We found median NCl<sub>3</sub>  
54  
55 concentrations of 0.18 mg/m<sup>3</sup> in ten different premises, while Hery et al 1995 [9] reported  
56  
57  
58  
59  
60

## LUNG FUNCTION and ASTHMA in POOL ENVIRONMENTS

1  
2  
3 0.14-0.91 mg/m<sup>3</sup> and Massin et al [3] reported a mean of 0.24 mg/m<sup>3</sup> in Public pool  
4 environments and 0.67 mg/m<sup>3</sup> in establishments with private owners. There are no previous  
5 published data on NCl<sub>3</sub> exposure in Swedish indoor pools. The work environment, i.e.  
6 ventilation and the use of sodium hypochlorite as disinfectant has probably not changed  
7 during the past decades. This makes it reasonable to estimate that pool workers have been  
8 exposed to NCl<sub>3</sub> at approximately the same levels as reported in this study.  
9  
10  
11  
12  
13  
14  
15  
16  
17

18 In the epidemiological part of the present study, we found a statistically significant  
19 relationship between the number of hours spent in swimming pool environments and the  
20 incidence of symptoms. The workers reported a high incidence of respiratory and mucous  
21 irritation symptoms from 13 percent for dyspnoea to 37 percent for eye irritation. These  
22 findings are in accordance with previous observations in France [3] and Holland [1].  
23  
24  
25  
26  
27  
28  
29  
30  
31

32 This study also found a higher prevalence of self-reported asthma in swimming pool workers  
33 than in a reference group. This difference remained when adjusted for age and sex, but failed  
34 to reach statistical significance (p = 0.11). Our nested case-referent study found an Odds Ratio  
35 (OR) for asthma of 2.53 (95% CI 0.89 – 7.19) for workers with more extensive exposure in  
36 pool areas (exposure level 2 compared to persons with exposure level 0 or 1). After correction  
37 for heredity the corresponding numbers were: OR 2.31 (95% CI 0.79 - 6.74). These values  
38 refer to cases of self-reported asthma occurring after they started to work in swimming-pool  
39 environments, compared to controls without asthma.  
40  
41  
42  
43  
44  
45  
46  
47  
48

49 Cases of asthma in pool workers have been reported in the United Kingdom [8], but no  
50 epidemiological evidence has been reported. The findings of the present study did not reach  
51 statistical significance and provide only limited support for a causal relationship between  
52 asthma and work at indoor swimming pools. However, the fact that there was a tendency  
53  
54  
55  
56  
57  
58  
59  
60

## LUNG FUNCTION and ASTHMA in POOL ENVIRONMENTS

1  
2  
3 towards a decreasing risk of asthma in workers with longer work history may indicate a  
4  
5 healthy worker effect due to the irritating properties of  $\text{NCl}_3$  in pool environments. A recent  
6  
7 study [21] reported a higher prevalence (4.5%) of new-onset asthma among recreational  
8  
9 swimmers with >320 hours of cumulative pool attendance compared to 0.4% among  
10  
11 swimmers with <320 hours of pool attendance, thus supporting a role for exposure at  
12  
13 chlorinated pools for development of asthma. In children engaged in recreational swimming, a  
14  
15 statistically significant relationship was shown between cumulative attendance at indoor  
16  
17 swimming pools and the probability of developing asthma in those with increased total IgE in  
18  
19 serum [14,19]. Attendance at chlorinated pools before the age of 2 years increased the risk of  
20  
21 bronchiolitis and asthma [22]  
22  
23  
24  
25  
26

27 The present findings support the previously advanced hypothesis [7, 14, 19,21] that exposures  
28  
29 to  $\text{NCl}_3$  levels commonly occurring in indoor swimming pool environments can cause acute  
30  
31 airway and mucosal symptoms as well as changes in lung function and deterioration of  
32  
33 asthma.  
34  
35  
36  
37

38 **Conclusions:** For the first time in adults, statistically significant decreases in lung function  
39  
40 were found in both previously unexposed subjects and pool-workers after exposure to pool air  
41  
42 containing 0.23 and 0.14  $\text{mg}/\text{m}^3$  respectively, of  $\text{NCl}_3$  compared to filtered air. The changes in  
43  
44 lung function occurred in adults without any signs of allergy and with low IgE values. In a  
45  
46 cohort of pool workers we found exposure-related acute mucous membrane and respiratory  
47  
48 symptoms. An increased odds ratio for asthma (OR 2.31, 95% CI 0.79-6.74) was indicated in  
49  
50 workers in the highest exposure category compared to lower exposures. Our observations give  
51  
52 support to a previously advanced hypothesis that current exposures to  $\text{NCl}_3$  can cause adverse  
53  
54  
55  
56  
57  
58  
59  
60

## LUNG FUNCTION and ASTHMA in POOL ENVIRONMENTS

1  
2  
3 effects on mucous membranes and lungs of humans and contribute to the development of  
4  
5 asthma. Further research in sensitive groups is warranted.  
6  
7  
8

9  
10 **Data sharing:** There is no additional data available  
11

12  
13  
14 **Acknowledgements:** This work was supported by the Swedish Council for Working Life and  
15  
16 Social Research (FAS) project 2004-0497 and the Swedish Research Council for  
17  
18 Environment, Agricultural Sciences and Spatial Planning (FORMAS) project 2005-1561. The  
19  
20 authors declare no competing interests.  
21  
22  
23

24  
25 Author's affiliations  
26

27 G. Nordberg, N-G Lundstrom, B. Forsberg, A Hagenbjork-Gustafsson, B. J-son Lagerkvist,  
28

29 M. Svensson, L. Nilsson, H. Bertilsson and Kåre Eriksson:  
30

31 Department of Public Health and Clinical Medicine, Occupational and Environmental  
32

33 Medicine, Umea University, Umea, Sweden;  
34

35  
36 A. Blomberg:  
37

38 Department of Public Health and Clinical Medicine, Medicine/Respiratory Medicine, Umea  
39

40 University, Umea, Sweden.  
41

42  
43 L. Nilsson:  
44

45 Department of Mathematical Statistics, Umea University, Umea, Sweden.  
46

47 A. Bernard, X. Dumont:  
48

49 Unit of Industrial Toxicology and Occupational Health, Catholic University of Louvain,  
50

51 Brussels, Belgium  
52  
53  
54  
55  
56  
57  
58  
59  
60

## LUNG FUNCTION and ASTHMA in POOL ENVIRONMENTS

**References**

1. Jacobs J H, Spaan S, van Rooy GB et al. Exposure to trichloramine and respiratory symptoms in indoor swimming pool workers. *Eur Respir J.* 2007 ; 29: 690-698.
2. Bowen AB, Kile JC, Otto C et al. Outbreaks of short-incubation ocular and respiratory illness following exposure to indoor swimming pools. *Environ Health Perspect* 2007; 115 : 267-71.
3. Massin N, Bohadana AB, Wild P et al. Respiratory symptoms and bronchial responsiveness in lifeguards exposed to nitrogen trichloride in indoor swimming pools. *Occup Environ Med* 1998; 55: 258-263.
4. Carbonnelle S, Francaux M, Doyle I et al. Changes in serum pneumoproteins caused by short-term exposures to nitrogen trichloride in indoor chlorinated swimming pools. *Biomarkers*, 2002 ;7 :464-478.
5. Carbonnelle S, Bernard A, Doyle IR, et al. Fractional exhaled NO and serum pneumoproteins after swimming in a chlorinated pool. *Med Sci Sports Exerc.* 2008 ;40:1472-6.
6. Blomberg A, Mudway I, Svensson M et al. Clara cell protein as a biomarker for ozone – induced lung injury in humans. *Eur Respir. J.* 2003 ;22 :883-888.

## LUNG FUNCTION and ASTHMA in POOL ENVIRONMENTS

- 1  
2  
3 7.. Lagerkvist BJ, Bernard A, Blomberg A et al.. Pulmonary epithelial integrity in children :  
4  
5 relationship to ambient ozone exposure and swimming pool attendance. *Environ Health*  
6  
7 *Perspect* 2004; 112: 1768-1771.  
8  
9
- 10  
11 8. Thickett KM, McCord JS, Gerber JM et al. Occupational Asthma caused by Chloramines  
12  
13 in indoor swimming-pool air. *Eur Respir J* 2002 ;19 :827-32  
14  
15  
16  
17
- 18 9. Hery M, Hecht G, Gerber JM et al. Exposure to chloramines in the atmosphere of indoor  
19  
20 swimming pools. *Ann Occup Hyg* 1995; 39:427-439.  
21  
22  
23  
24
- 25 10. Bernard A, Marchandise FX, Depelchin S et al Clara cell protein in serum and  
26  
27 bronchalveolar lavage. *Eur Resp J*. 1992 ; 5 :1231-1238.  
28  
29  
30  
31
- 32 11. Hermans C, Aly O, Nyberg BI et al. Determinants of Clara cell protein (CC16)  
33  
34 concentration in serum: a reassessment with two different immunoassays. *Clin Chim Acta*  
35  
36 1998 ; 272: 101-110.  
37  
38  
39  
40
- 41 12. Helleday R, Segerstedt B, Forsberg B et al. Exploring the time dependence of serum Clara  
42  
43 cell protein as a biomarker of pulmonary injury in humans. *Chest*, 2006 ; 130: 672-675.  
44  
45  
46  
47
- 48 13. Torén K, Gislason T, Omenaas E et al. A prospective study of asthma incidence and its  
49  
50 predictors : the RHINE study. *Eur Respir J* 2004 ; 24 : 942-946  
51  
52  
53  
54  
55  
56  
57  
58  
59  
60

## LUNG FUNCTION and ASTHMA in POOL ENVIRONMENTS

1  
2  
3 14. Bernard A, Carbonelle S, Michel O et al. Lung hyperpermeability and asthma prevalence  
4  
5 in schoolchildren : unexpected associations with the attendance at indoor chlorinated  
6  
7 swimming pools. *Occup Environ Med* 2003 ;60 :385-94.  
8  
9

10  
11 15. Hermans C, Bernard A. Clara cell protein: characteristics and potential applications as  
12  
13 marker of lung toxicity. *Biomarkers* 1996; 1:3-8.  
14  
15

16  
17 16. Broeckaert F, Arsalane K, Hermans C et al. Lung epithelial damage at low concentrations  
18  
19 of ambient ozone. *Lancet* 1999; 353:900-901.  
20  
21  
22

23  
24 17.. Hermans C and Bernard A State of the Art. Lung Epithelium-specific Proteins.  
25  
26 Characteristics and potential applications as markers. *Am J Respir Crit Care Med* 1999;  
27  
28 159:646-678.  
29  
30  
31

32  
33 18..German Working Group on Indoor Guide Values of the Federal Environment Agency,  
34  
35 Risk assessment of trichloramine in the air of indoor swimming pools. *Bundesgesundheitsbl.*  
36  
37 2011 ; 54 :997 -1004 [in German with abstract in English]  
38  
39

40  
41 19. Bernard A, Carbonnelle S, De Burbure C et al. Chlorinated pool attendance, atopy, and  
42  
43 the risk of asthma during childhood. *Environ Health Perspect* 2006 ;114 : 1567-73.  
44  
45

46  
47 20. Helenius IJ, Tikkanen HO, Sarna S et al. Astma and increased bronchial responsiveness  
48  
49 in elite athletes: atopy and sports event as risk factors. *J Allergy Clin Immunol* 1998,  
50  
51 101, 646-52  
52  
53

54 21. Ferrari M, Schenk K, Mantovani W et al. Attendance at chlorinated indoor pools and risk  
55  
56 of asthma in adult recreational swimmers. *J Sci Med Sport.* 2011; 14: 184-189.  
57  
58  
59  
60



## LUNG FUNCTION and ASTHMA in POOL ENVIRONMENTS

22. Viosin C, Sardella A, Marcucci F et al. Infant swimming in chlorinated pools and the risk of bronchiolitis, asthma and allergy. *Eur. Resp J* 2010 ; 36 : 41-47

### Figures and Tables

**Table 1.** Healthy volunteers (n=37): FEV<sub>1</sub> (forced expiratory volume, liter during 1 sec) and FEV% (FEV<sub>1</sub>x100/forced vital capacity ) measured before and after 2h exercise in filtered and pool air respectively. Mean  $\pm$  SD. Mean differences (before-after) within parentheses.

| Expiratory volume | Exposure in filtered air |                 |                               | Exposure in pool air |                 |                               |
|-------------------|--------------------------|-----------------|-------------------------------|----------------------|-----------------|-------------------------------|
|                   | before                   | after           | mean diff<br>$\Delta$ -values | before               | after           | mean diff<br>$\Delta$ -values |
| FEV <sub>1</sub>  | 4.10 $\pm$ 0.85          | 4.11 $\pm$ 0.87 | (-0.01) <sup>o</sup>          | 4.14 $\pm$ 0.87      | 4.09 $\pm$ 0.86 | (0.05)**                      |
| FEV%              | 80.5 $\pm$ 5.8           | 80.9 $\pm$ 5.2  | (-0.4) <sup>o</sup>           | 80.7 $\pm$ 5.3       | 79.9 $\pm$ 5.3  | (0.8)*                        |

\*\*FEV<sub>1</sub> significantly lower after exposure to pool air, p = 0.01

\*FEV% lower after exposure to pool air, p = 0.05

<sup>o</sup>difference not statistically significant

The FEV<sub>1</sub>  $\Delta$ -values were -0.01 liter/sec in filtered air and 0.05 liter/sec in pool air, difference statistically significant, p = 0.01 (paired t-test).

Paired t-test of the difference in FEV%  $\Delta$ -value in filtered air (mean -0.4 %) as compared pool s air (mean 0.8 %) was statistically significant, p = 0.004.

## LUNG FUNCTION and ASTHMA in POOL ENVIRONMENTS

**Table 2.** Swimming pool workers (n=14): FEV<sub>1</sub> (forced expiratory volume, liter during 1 sec) and FEV% (FEV<sub>1</sub>×100/forced vital capacity) measured before and after 2h exercise in filtered air and pool air respectively. Mean ± SD. Mean differences (before-after) within parentheses.

| Expiratory volume | Exposure in filtered air |              |                        | Exposure in pool air |             |                        |
|-------------------|--------------------------|--------------|------------------------|----------------------|-------------|------------------------|
|                   | before                   | after        | mean diff<br>Δ -values | before               | after       | mean diff<br>Δ -values |
| FEV <sub>1</sub>  | 3.56 ± 0.99              | 3.51 ± 0.91  | (0.05) <sup>°</sup>    | 3.59 ± 0.93          | 3.57 ± 0.92 | (0.014) <sup>°</sup>   |
| FEV%              | 78.86 ± 6.3              | 78.43 ± 5.42 | (0.43) <sup>°</sup>    | 79.1 ± 4.1           | 77.8 ± 5.1  | (1.36)*                |

\*FEV% lower after exposure to pool air, p = 0.003 (Wilcoxon signed rank test).

<sup>°</sup> indicates no statistically significant difference

### Figure legends

Figure 1: Mean values (µg/L) and SD for CC16corr at various time points before (0h), immediately after exposure (2h) and the following 2 (4h), 4 (6h) and 6 hours (8h). Values are shown for the previously unexposed group of healthy volunteers (A) after exposure in a pool environment, after exposure to filtered air (two upper set of lines and bars). The two lower lines and related bars represent exposure in pool environment and filtered air for Group B, recruited among pool workers with several years exposure to pool environments.

Figure 2: Mean and SD for measured SPD values (µg/L) at various time points (0-8 hours) of the study. Exposure to pool environment or filtered air took place for 2 hours (between 0h and 2h). Group A: previously unexposed healthy volunteers. Group B: pool workers

Fig 1 (separate file)

Fig 2(separate file)

## LUNG FUNCTION and ASTHMA in POOL ENVIRONMENTS

**Statement:**

The Corresponding Author has the right to grant on behalf of all authors and does grant on behalf of all authors, an exclusive license (or non-exclusive for government employees) on a worldwide basis to the BMJ Group and co-owners or contracting owning societies (where published by the BMJ Group on their behalf), and its Licensees to permit this article (if accepted) to be published in Occupational and Environmental Medicine and any other BMJ Group products and to exploit all subsidiary rights, as set out in our license.”

**Contributorship statement:**

"The contributions of the authors are as follows: G.Nordberg 1,2,3; N-G.Lundstrom 1,2,3; B.Forsberg1,2,3; A.Hagenbjork-Gustafsson1,2,3; B. J-son Lagerkvist1,2,3; J. Nilsson1,2,3; M.Svensson1,2,3; A.Blomberg1, 2,3; L. Nilsson1,2,3; A. Bernard1,2,3; X. Dumont1,2,3; H.Bertilsson1,2,3 and K. Eriksson1,2,3.

1) substantial contributions to conception and design, acquisition of data, or analysis and interpretation of data; 2) drafting the article or revising it critically for important intellectual content; and 3) final approval of the version to be published."

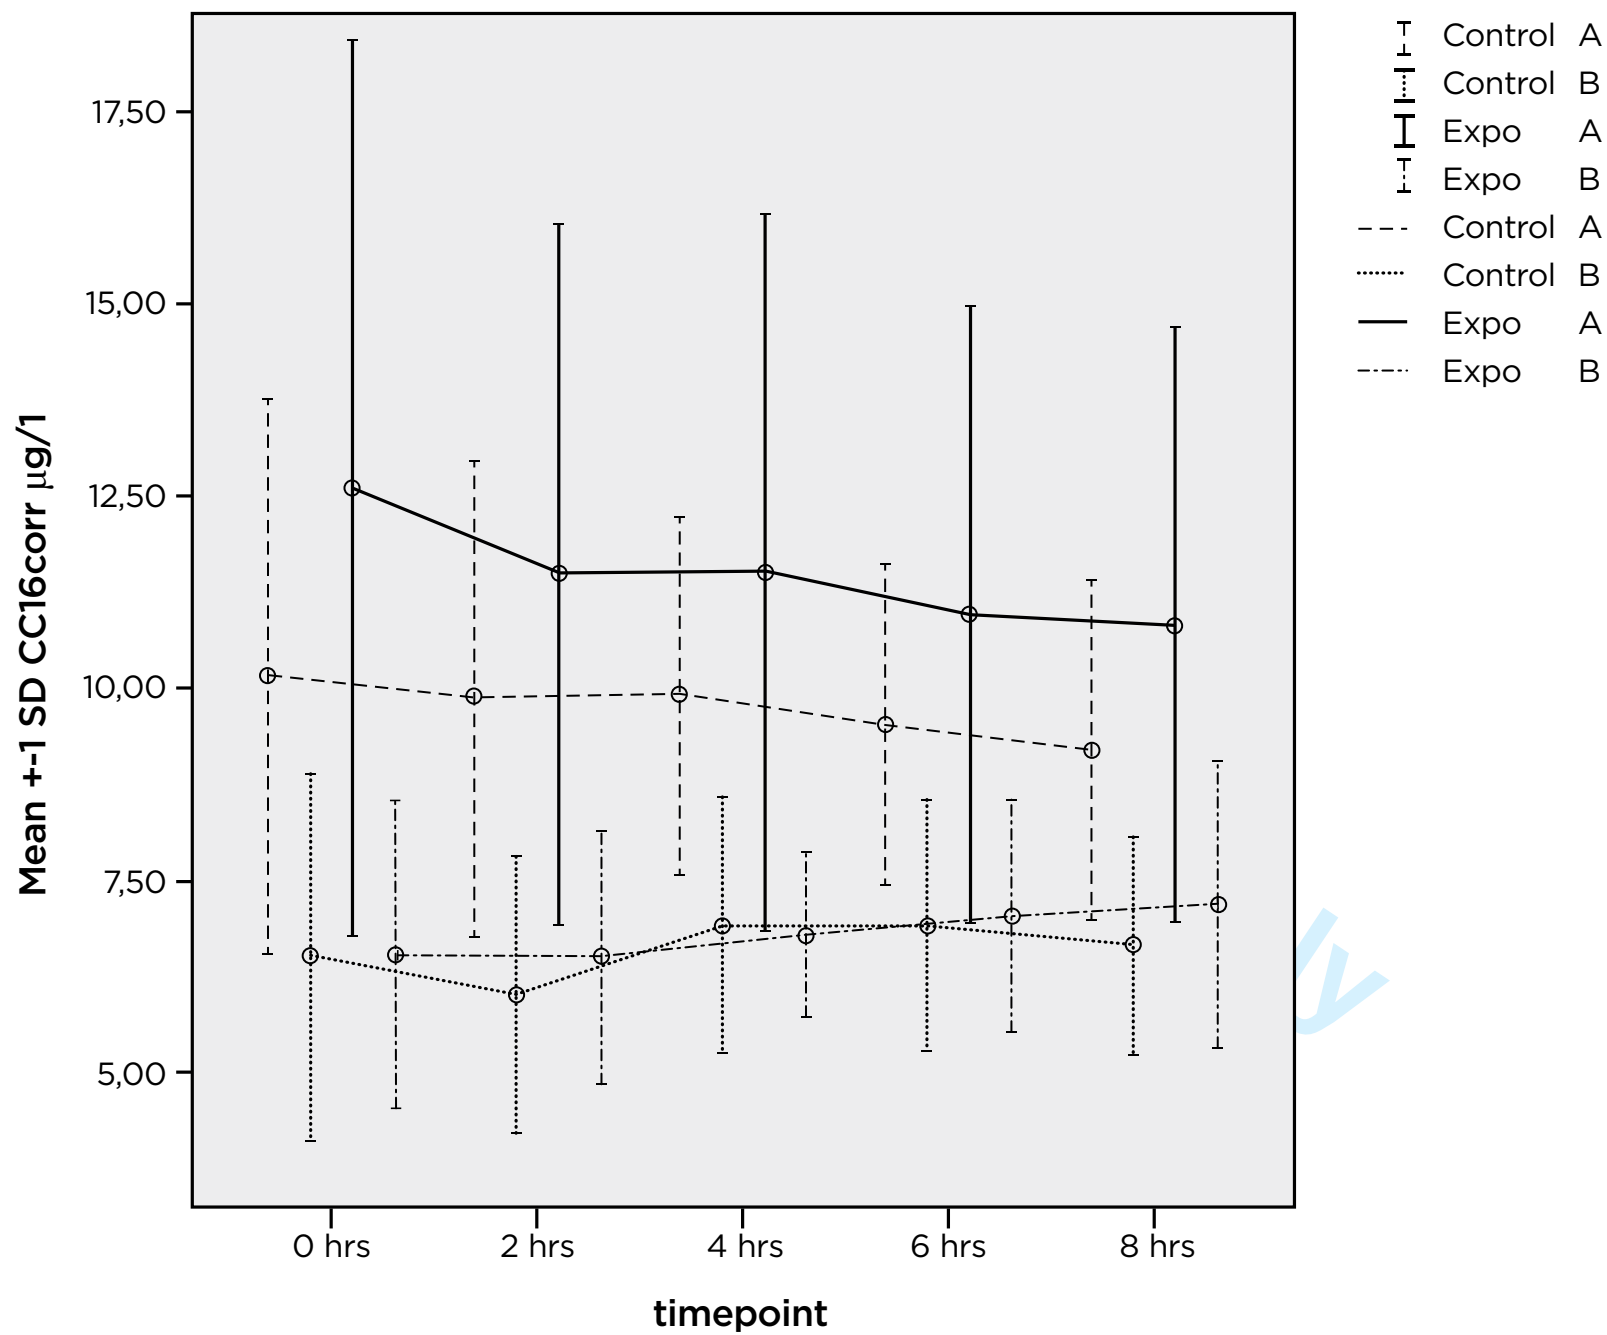

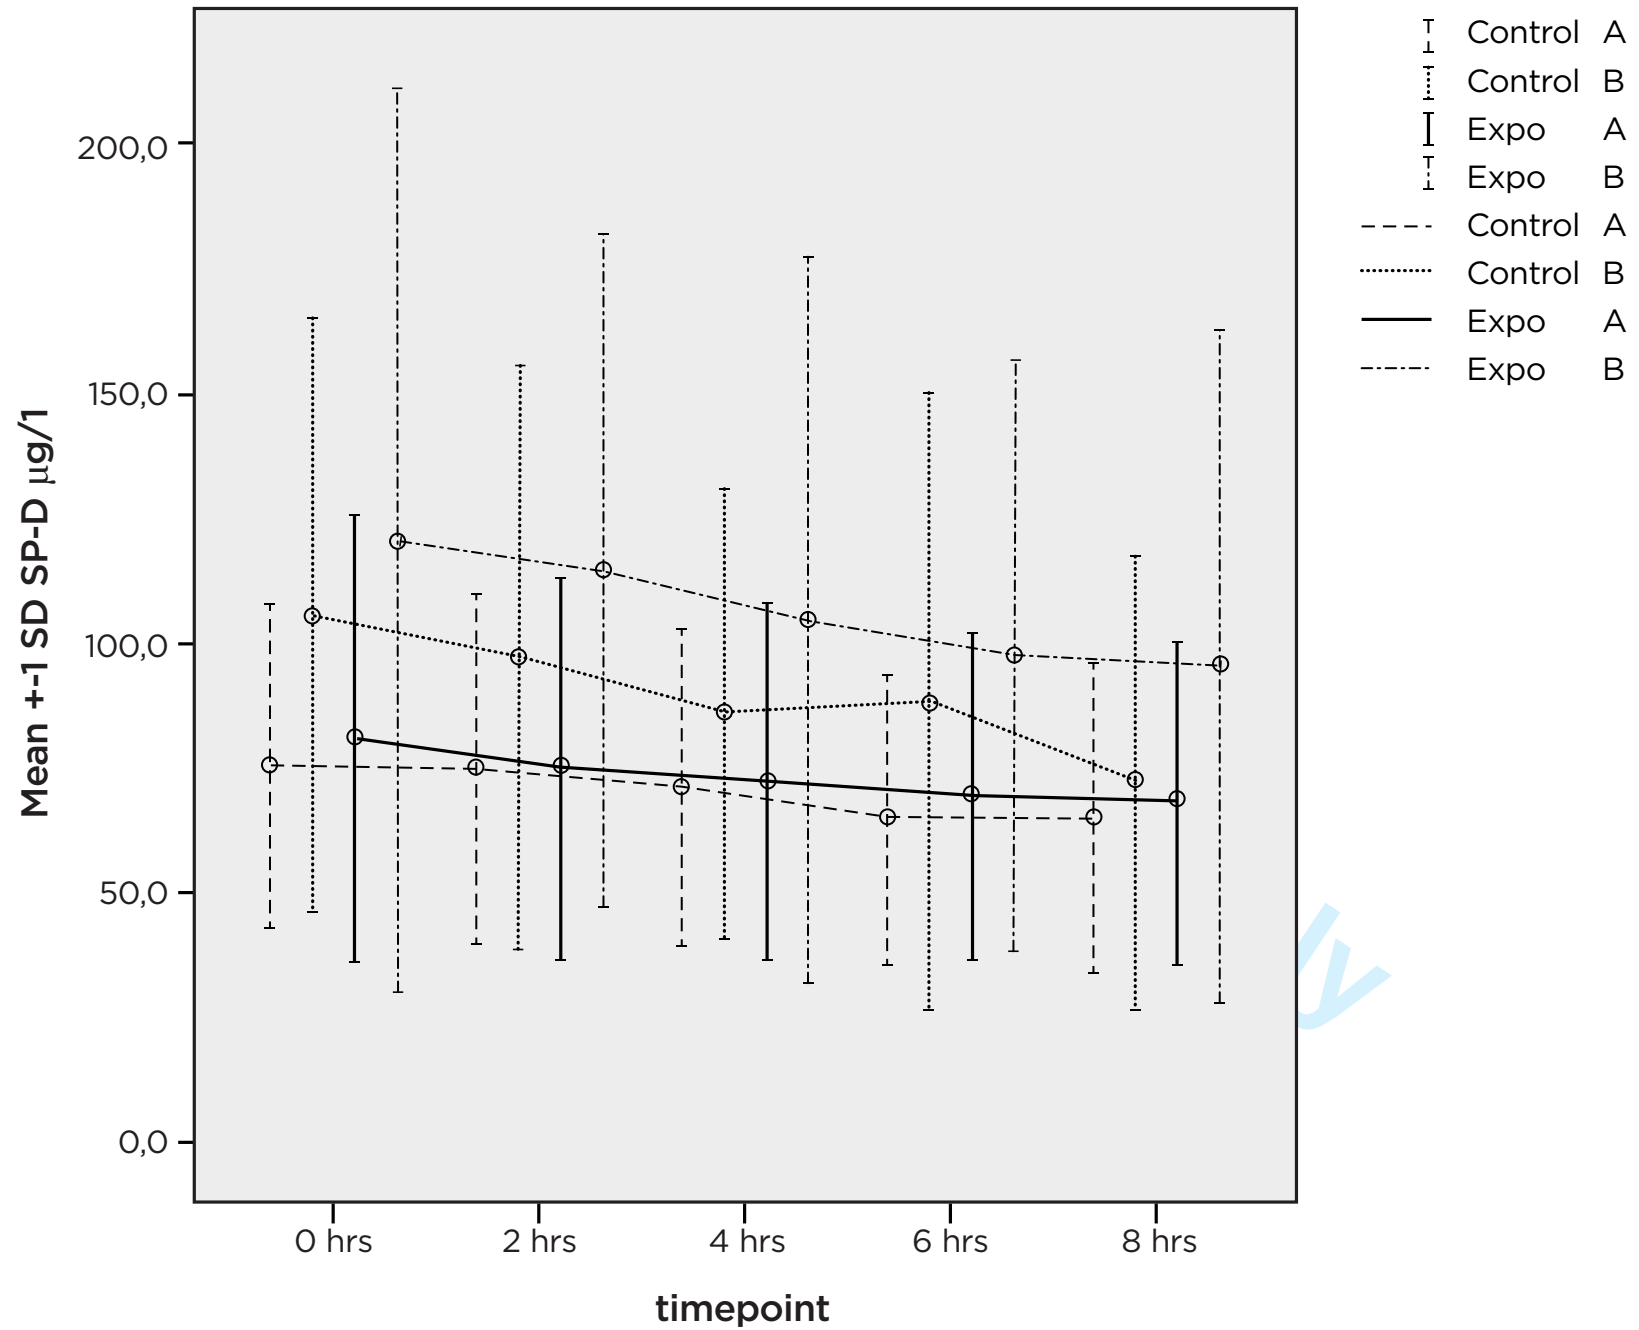

1  
2  
3  
4  
5  
6  
7  
8  
9  
10  
11  
12  
13  
14  
15  
16  
17  
18  
19  
20  
21  
22  
23  
24  
25  
26  
27  
28  
29  
30  
31  
32  
33  
34  
35  
36  
37  
38  
39  
40  
41  
42  
43  
44  
45  
46  
47

1  
2  
3  
4  
5  
6  
7  
8  
9  
10  
11  
12  
13  
14  
15  
16  
17  
18  
19  
20  
21  
22  
23  
24  
25  
26  
27  
28  
29  
30  
31  
32  
33  
34  
35  
36  
37  
38  
39  
40  
41  
42  
43  
44  
45  
46  
47  
48  
49  
50  
51  
52  
53  
54  
55  
56  
57  
58  
59  
60

## STROBE Statement—checklist of items that should be included in reports of observational studies

|                              | Item No | Recommendation                                                                                                                                                                                                                                                                                                                                                                                                                                                                                                                                                                                                                                                                                   |
|------------------------------|---------|--------------------------------------------------------------------------------------------------------------------------------------------------------------------------------------------------------------------------------------------------------------------------------------------------------------------------------------------------------------------------------------------------------------------------------------------------------------------------------------------------------------------------------------------------------------------------------------------------------------------------------------------------------------------------------------------------|
| <b>Title and abstract</b>    | 1       | (a) Indicate the study's design with a commonly used term in the title or the abstract<br>(b) Provide in the abstract an informative and balanced summary of what was done and what was found                                                                                                                                                                                                                                                                                                                                                                                                                                                                                                    |
| <b>Introduction</b>          |         |                                                                                                                                                                                                                                                                                                                                                                                                                                                                                                                                                                                                                                                                                                  |
| Background/rationale         | 2       | Explain the scientific background and rationale for the investigation being reported                                                                                                                                                                                                                                                                                                                                                                                                                                                                                                                                                                                                             |
| Objectives                   | 3       | State specific objectives, including any prespecified hypotheses                                                                                                                                                                                                                                                                                                                                                                                                                                                                                                                                                                                                                                 |
| <b>Methods</b>               |         |                                                                                                                                                                                                                                                                                                                                                                                                                                                                                                                                                                                                                                                                                                  |
| Study design                 | 4       | Present key elements of study design early in the paper                                                                                                                                                                                                                                                                                                                                                                                                                                                                                                                                                                                                                                          |
| Setting                      | 5       | Describe the setting, locations, and relevant dates, including periods of recruitment, exposure, follow-up, and data collection                                                                                                                                                                                                                                                                                                                                                                                                                                                                                                                                                                  |
| Participants                 | 6       | (a) <i>Cohort study</i> —Give the eligibility criteria, and the sources and methods of selection of participants. Describe methods of follow-up<br><i>Case-control study</i> —Give the eligibility criteria, and the sources and methods of case ascertainment and control selection. Give the rationale for the choice of cases and controls<br><i>Cross-sectional study</i> —Give the eligibility criteria, and the sources and methods of selection of participants<br>(b) <i>Cohort study</i> —For matched studies, give matching criteria and number of exposed and unexposed<br><i>Case-control study</i> —For matched studies, give matching criteria and the number of controls per case |
| Variables                    | 7       | Clearly define all outcomes, exposures, predictors, potential confounders, and effect modifiers. Give diagnostic criteria, if applicable                                                                                                                                                                                                                                                                                                                                                                                                                                                                                                                                                         |
| Data sources/<br>measurement | 8*      | For each variable of interest, give sources of data and details of methods of assessment (measurement). Describe comparability of assessment methods if there is more than one group                                                                                                                                                                                                                                                                                                                                                                                                                                                                                                             |
| Bias                         | 9       | Describe any efforts to address potential sources of bias                                                                                                                                                                                                                                                                                                                                                                                                                                                                                                                                                                                                                                        |
| Study size                   | 10      | Explain how the study size was arrived at                                                                                                                                                                                                                                                                                                                                                                                                                                                                                                                                                                                                                                                        |
| Quantitative variables       | 11      | Explain how quantitative variables were handled in the analyses. If applicable, describe which groupings were chosen and why                                                                                                                                                                                                                                                                                                                                                                                                                                                                                                                                                                     |
| Statistical methods          | 12      | (a) Describe all statistical methods, including those used to control for confounding<br>(b) Describe any methods used to examine subgroups and interactions<br>(c) Explain how missing data were addressed<br>(d) <i>Cohort study</i> —If applicable, explain how loss to follow-up was addressed<br><i>Case-control study</i> —If applicable, explain how matching of cases and controls was addressed<br><i>Cross-sectional study</i> —If applicable, describe analytical methods taking account of sampling strategy<br>(e) Describe any sensitivity analyses                                                                                                                                |

Continued on next page

1  
2  
3  
4  
5  
6  
7  
8  
9  
10  
11  
12  
13  
14  
15  
16  
17  
18  
19  
20  
21  
22  
23  
24  
25  
26  
27  
28  
29  
30  
31  
32  
33  
34  
35  
36  
37  
38  
39  
40  
41  
42  
43  
44  
45  
46  
47  
48  
49  
50  
51  
52  
53  
54  
55  
56  
57  
58  
59  
60**Results**

|                  |     |                                                                                                                                                                                                                                                                                                                                                                                                               |
|------------------|-----|---------------------------------------------------------------------------------------------------------------------------------------------------------------------------------------------------------------------------------------------------------------------------------------------------------------------------------------------------------------------------------------------------------------|
| Participants     | 13* | (a) Report numbers of individuals at each stage of study—eg numbers potentially eligible, examined for eligibility, confirmed eligible, included in the study, completing follow-up, and analysed<br>(b) Give reasons for non-participation at each stage<br>(c) Consider use of a flow diagram                                                                                                               |
| Descriptive data | 14* | (a) Give characteristics of study participants (eg demographic, clinical, social) and information on exposures and potential confounders<br>(b) Indicate number of participants with missing data for each variable of interest<br>(c) <i>Cohort study</i> —Summarise follow-up time (eg, average and total amount)                                                                                           |
| Outcome data     | 15* | <i>Cohort study</i> —Report numbers of outcome events or summary measures over time<br><i>Case-control study</i> —Report numbers in each exposure category, or summary measures of exposure<br><i>Cross-sectional study</i> —Report numbers of outcome events or summary measures                                                                                                                             |
| Main results     | 16  | (a) Give unadjusted estimates and, if applicable, confounder-adjusted estimates and their precision (eg, 95% confidence interval). Make clear which confounders were adjusted for and why they were included<br>(b) Report category boundaries when continuous variables were categorized<br>(c) If relevant, consider translating estimates of relative risk into absolute risk for a meaningful time period |
| Other analyses   | 17  | Report other analyses done—eg analyses of subgroups and interactions, and sensitivity analyses                                                                                                                                                                                                                                                                                                                |

**Discussion**

|                  |    |                                                                                                                                                                            |
|------------------|----|----------------------------------------------------------------------------------------------------------------------------------------------------------------------------|
| Key results      | 18 | Summarise key results with reference to study objectives                                                                                                                   |
| Limitations      | 19 | Discuss limitations of the study, taking into account sources of potential bias or imprecision. Discuss both direction and magnitude of any potential bias                 |
| Interpretation   | 20 | Give a cautious overall interpretation of results considering objectives, limitations, multiplicity of analyses, results from similar studies, and other relevant evidence |
| Generalisability | 21 | Discuss the generalisability (external validity) of the study results                                                                                                      |

**Other information**

|         |    |                                                                                                                                                               |
|---------|----|---------------------------------------------------------------------------------------------------------------------------------------------------------------|
| Funding | 22 | Give the source of funding and the role of the funders for the present study and, if applicable, for the original study on which the present article is based |
|---------|----|---------------------------------------------------------------------------------------------------------------------------------------------------------------|

\*Give information separately for cases and controls in case-control studies and, if applicable, for exposed and unexposed groups in cohort and cross-sectional studies.

**Note:** An Explanation and Elaboration article discusses each checklist item and gives methodological background and published examples of transparent reporting. The STROBE checklist is best used in conjunction with this article (freely available on the Web sites of PLoS Medicine at <http://www.plosmedicine.org/>, Annals of Internal Medicine at <http://www.annals.org/>, and Epidemiology at <http://www.epidem.com/>). Information on the STROBE Initiative is available at [www.strobe-statement.org](http://www.strobe-statement.org).



**Lung function in volunteers before and after exposure to trichloramine in indoor pool environments and asthma in a cohort of pool workers**

|                                 |                                                                                                                                                                                                                                                                                                                                                                                                                                                                                                                                                                                                                                                                                                                                                                                                                                                                                                                                                                                                                               |
|---------------------------------|-------------------------------------------------------------------------------------------------------------------------------------------------------------------------------------------------------------------------------------------------------------------------------------------------------------------------------------------------------------------------------------------------------------------------------------------------------------------------------------------------------------------------------------------------------------------------------------------------------------------------------------------------------------------------------------------------------------------------------------------------------------------------------------------------------------------------------------------------------------------------------------------------------------------------------------------------------------------------------------------------------------------------------|
| Journal:                        | <i>BMJ Open</i>                                                                                                                                                                                                                                                                                                                                                                                                                                                                                                                                                                                                                                                                                                                                                                                                                                                                                                                                                                                                               |
| Manuscript ID:                  | bmjopen-2012-000973.R1                                                                                                                                                                                                                                                                                                                                                                                                                                                                                                                                                                                                                                                                                                                                                                                                                                                                                                                                                                                                        |
| Article Type:                   | Research                                                                                                                                                                                                                                                                                                                                                                                                                                                                                                                                                                                                                                                                                                                                                                                                                                                                                                                                                                                                                      |
| Date Submitted by the Author:   | 02-Aug-2012                                                                                                                                                                                                                                                                                                                                                                                                                                                                                                                                                                                                                                                                                                                                                                                                                                                                                                                                                                                                                   |
| Complete List of Authors:       | Nordberg, Gunnar; Umea University, Public Health and Clinical Medicine<br>Lundstrom, Nils-Goran; Umea University, Public Health and Clinical Medicine<br>Forsberg, Bertil; Umea University, Public Health and Clinical Medicine<br>Hagenbjork Gustafsson, Annika; Umea University, Public Health and Clinical Medicine<br>Lagerkvist, Birgitta; Umea University, Public Health and Clinical Medicine<br>Nilsson, Johan; Umea University, Public Health and Clinical Medicine<br>Svensson, Mona; Umea University, Public Health and Clinical Medicine<br>Blomberg, Anders; Umea University, Public Health and Clinical Medicine<br>Nilsson, Leif; Umea University, Mathematical Statistics<br>Bernard, Alfred; Universite Catholique de Louvain, Toxicology and Occupational Health<br>Dumont, Xavier; Universite Catholique de Louvain, Toxicology and Occupational Health<br>Bertilsson, Helen; Umea University, Public Health and Clinical Medicine<br>Eriksson, Kare; Umea University, Public Health and Clinical Medicine |
| <b>Primary Subject Heading</b>: | Respiratory medicine                                                                                                                                                                                                                                                                                                                                                                                                                                                                                                                                                                                                                                                                                                                                                                                                                                                                                                                                                                                                          |
| Secondary Subject Heading:      | Public health, Occupational and environmental medicine                                                                                                                                                                                                                                                                                                                                                                                                                                                                                                                                                                                                                                                                                                                                                                                                                                                                                                                                                                        |
| Keywords:                       | PUBLIC HEALTH, RESPIRATORY MEDICINE (see Thoracic Medicine), OCCUPATIONAL & INDUSTRIAL MEDICINE                                                                                                                                                                                                                                                                                                                                                                                                                                                                                                                                                                                                                                                                                                                                                                                                                                                                                                                               |
|                                 |                                                                                                                                                                                                                                                                                                                                                                                                                                                                                                                                                                                                                                                                                                                                                                                                                                                                                                                                                                                                                               |

SCHOLARONE™  
Manuscripts



## LUNG FUNCTION and ASTHMA in POOL ENVIRONMENTS

20120802

**Lung function in volunteers before and after exposure to trichloramine in indoor pool environments and asthma in a cohort of pool workers**

G. Nordberg, N-G. Lundstrom, B. Forsberg, A. Hagenbjork-Gustafsson, B. J-son Lagerkvist, J. Nilsson, M. Svensson, A. Blomberg, L. Nilsson, A. Bernard, X. Dumont, H. Bertilsson and K. Eriksson

Address correspondence to G. Nordberg, Department of Public Health and Clinical Medicine, Umea University, SE-90187 Umea, Sweden. Telephone. +46 90 7852727. E-mail [gunnar.nordberg@envmed.umu.se](mailto:gunnar.nordberg@envmed.umu.se)

List of abbreviations:

- CC16: Clara Cell protein 16
- FEV<sub>1</sub>: Forced Expiratory Volume in 1 second, liters
- FEV<sub>%</sub>: FEV<sub>1</sub>x100/FVC
- FVC: Forced Vital Capacity, liter
- NCl<sub>3</sub>: Nitrogen trichloride or trichloramine
- OR: Odds Ratio
- RHINE: Respiratory Health in Northern Europe
- SPD: Surfactant protein D

## LUNG FUNCTION and ASTHMA in POOL ENVIRONMENTS

**Summary:****1) Article focus:**

# Exposure to trichloramine (NCl<sub>3</sub>) in swimming-pool air is known to cause mucous membrane and pulmonary effects, but statistically significant changes in lung function among adults have not been reported.

# Epidemiological studies of asthma among pool workers are not available.

**2) Key messages:**

# In this study we found for the first time, statistically significant decreases in lung function in volunteers after exposure to pool air with commonly occurring levels of NCl<sub>3</sub>.

# We found a tendency towards a higher odds ratio (OR) for asthma in a nested case reference study within a cohort of 1102 pool workers.

# Our findings support the notion that current workroom exposures of NCl<sub>3</sub> may contribute to asthma development.

**3) Strengths and limitations:** This is the first study showing small but statistically significant decreases in lung function after exposure to pool air. This is the first nested Case/Control study in pool workers. It reports an OR for asthma of 2.31 (95% CI 0.79-6.74) among pool workers with the highest exposure (after correction for heredity), but this finding did not reach statistical significance.

## LUNG FUNCTION and ASTHMA in POOL ENVIRONMENTS

**ABSTRACT**

**Objectives:** Exposure to trichloramine ( $\text{NCl}_3$ ) in indoor swimming pool environments is known to cause mucous membrane irritation, but if it gives rise to changes in lung function or asthma in adults is not known. 1: We determined lung function in volunteers before and after exposure to indoor pool environments 2: We studied the occurrence of respiratory symptoms and asthma in a cohort of pool workers.

**Design/Methods/Participants:** 1. We studied two groups of volunteers, 37 previously non-exposed healthy persons and 14 pool workers, who performed exercise for two hours in an indoor pool environment.  $\text{NCl}_3$  in air was measured during pool exposures and in 10 other pool environments. Filtered air exposures were used as controls. Lung function and biomarkers of pulmonary epithelial integrity were measured before and after exposure. 2. We mailed a questionnaire to 1741 persons who indicated in the Swedish census 1990 that they worked at indoor swimming-pools.

**Results:** 1. In previously non-exposed volunteers, statistically significant decreases in  $\text{FEV}_1$  and  $\text{FEV}_\%$  ( $p=0.01$  and  $p=0.05$  respectively) were found after exposure to pool air ( $0.23 \text{ mg/m}^3$  of  $\text{NCl}_3$ ). In pool workers, a statistically significant decrease in  $\text{FEV}_\%$  ( $p=0.003$ ) was seen (but no significant change of  $\text{FEV}_1$ ) .. In the 10 other pool environments the median  $\text{NCl}_3$  concentration was  $0.18 \text{ mg/m}^3$ . 2. Our nested Case/Control study in pool workers found an OR for asthma of 2.31 (95% CI 0.79-6.74) among those with the highest exposure. Exposure-related acute mucous membrane and respiratory symptoms were also found.

**Conclusions:** This is the first study in adults showing statistically significant decreases in lung function after exposure to  $\text{NCl}_3$ . An increased OR for asthma among highly exposed pool workers did not reach statistical significance, but the combined evidence supports the notion that current workroom exposures may contribute to asthma development. Further research on sensitive groups is warranted.

## LUNG FUNCTION and ASTHMA in POOL ENVIRONMENTS

**INTRODUCTION and OBJECTIVES**

Mono-, di- and trichloramines are formed following a reaction between ammonia (NH<sub>3</sub>) or other nitrogen containing substances present in swimming pool water when hypochlorite is used as a disinfectant. Trichloramine (NCl<sub>3</sub>) is the most volatile chloramine and is emitted into the air of indoor swimming pools. Exposure to this substance was the suspected cause of outbreaks of short-incubation ocular and respiratory illness [1,2], but concentrations of NCl<sub>3</sub> in pool environments were not known in these outbreaks. It is known, however, that acute respiratory and eye symptoms may occur among recreational swimmers in relation to measured levels of NCl<sub>3</sub> in pool environments [3] and NCl<sub>3</sub> is considered to be the causative agent.

Only few and inconclusive studies have been performed on lung function among adults after exposures to measured levels of NCl<sub>3</sub> in pool environments [4,5] and additional studies are required.

Clara cell protein 16 (CC16) is an epithelial protective protein in peripheral lung tissue and changes in its serum levels are used as a biomarker of epithelial integrity [6]. It has been shown to be decreased in relation to frequency of pool attendance [7]. However, changes in serum levels of CC16 have not been studied after short term exposure to NCl<sub>3</sub>.

Thickett et al 2002 [8] reported three cases of occupational asthma among British pool workers exposed to NCl<sub>3</sub>. There is a lack of epidemiological studies on asthma among those working in swimming pool environments.

The objectives of the present study were 1. To perform a controlled human exposure study of

## LUNG FUNCTION and ASTHMA in POOL ENVIRONMENTS

1  
2  
3 lung function and biomarkers of pulmonary epithelial integrity in volunteers before and after  
4 exposure to indoor swimming pool environments. 2. To perform an epidemiological study of  
5 self-reported asthma and subjective symptoms in a cohort of indoor swimming pool workers  
6  
7  
8  
9

**DESIGN, MATERIALS AND METHODS****Air sampling and determination of  $\text{NCl}_3$ :*****Exposure measurements in human exposure study***

10  
11  
12  
13  
14  
15  
16  
17  
18  
19  
20  
21  
22  
23 In the two pool environments where our study of volunteers and pool-workers took place  
24 hypochlorite was used as disinfectant. Air samples were collected in the breathing zone: one  
25 sample for each 2-hour exposure, in total 51 samples.  
26  
27  
28  
29  
30  
31

***Determination of  $\text{NCl}_3$  at other indoor swimming pools:***

32  
33  
34 Additional determinations of  $\text{NCl}_3$  were performed 2004-2008 at 10 different pool  
35 establishments (7 conventional ones and 3 “adventure water lands”) in northern Sweden with  
36 totally 30 indoor pools. Hypochlorite was used as disinfectant. At each swimming-pool, air  
37 was sampled during 3 hours at 3 to 4 different locations in close vicinity of the pool. The  
38 equipment was mounted on a stand with the filter at a height of approximately 1.5 meter.  
39  
40  
41  
42  
43  
44  
45  
46  
47  
48  
49  
50  
51  
52  
53  
54  
55  
56  
57  
58  
59  
60  
60 Sampling was performed on three different days during winter and three different days during  
summer.

***Air collection and Analysis:*** 1L/min of air was pumped through a filter (quartz filter QM-A  
37 mm Whatman International Ltd., Maidstone, England). The filter was soaked in a solution  
of sodium carbonate and arsenic trioxide ( $\text{AsO}_3$ ) and dried as presented earlier [9]. When

## LUNG FUNCTION and ASTHMA in POOL ENVIRONMENTS

1  
2  
3 NCl<sub>3</sub> is collected on the filter it is reduced to chloride ion (Cl<sup>-</sup>) [9]. After sampling, the filters  
4  
5 were extracted with 10 ml of ultra-pure water, shaken for 30 minutes and filtered through a 13  
6  
7 mm syringe filter (IC Acrodisc®, PALL). The chlorides were analyzed in a suppressed ion  
8  
9 chromatography system (Triatlon 900 autosampler, Spark, The Netherlands); ICsep AN1,  
10  
11 Anion column (CETAC, Omaha, USA); SCX membrane suppressor column (Sequant, Umeå,  
12  
13 Sweden); JD-21 conductivity detector (Costech Microanalytical Ltd, Tallin, Estonia)). The  
14  
15 eluent was 7.5 mM NaOH and the suppressor 5 mM H<sub>2</sub>SO<sub>4</sub>. Control samples of two known  
16  
17 chloride concentrations (0.5, 3.0 mg l<sup>-1</sup>) and at least two blanks were run together with the  
18  
19 samples in each run. The chloride concentrations in the blanks were subtracted from the  
20  
21 concentration in the samples. The detection limits of NCl<sub>3</sub> (1.78 and 1.18 µg m<sup>-3</sup> for 2 h and 3  
22  
23 h samplings, respectively) were determined as three times the mean standard deviation of the  
24  
25 amount collected on filters of 10 blanks. The limits of quantification (5.9 µg m<sup>-3</sup> and 3.9 µg m<sup>-3</sup>  
26  
27 for 2 h and 3 h samplings respectively) were determined as ten times the mean standard  
28  
29 deviation for the same blanks.  
30  
31  
32  
33  
34  
35  
36  
37  
38

## Human exposure study

### Study groups:

39  
40  
41 Group A: 37 healthy subjects (20 men and 17 women, mean age 24.5 years). They were not  
42  
43 regular swimming pool visitors and they had not visited a swimming pool within four weeks  
44  
45 before study start.  
46  
47  
48

49  
50 Group B: 14 workers at swimming pools (5 men, 9 women, mean age 39.9 years).  
51  
52  
53  
54  
55  
56  
57  
58  
59  
60

## LUNG FUNCTION and ASTHMA in POOL ENVIRONMENTS

All participants were non-smokers with normal lung function and had no history of allergy or pre-existing lung disease. Subjects were free of airway infection for  $\geq 4$  weeks prior to the first exposure and throughout the remainder of the study.

***Study design***

The study was conducted in a crossover control fashion. Each volunteer was exposed to filtered air in an exposure chamber and on another occasion to an indoor pool environment. In the exposure chamber, located in a separate building away from swimming-pools, incoming air was adjusted to room temperature and filtered through a particle filter. The exposures were performed in random order. Successive exposures were separated by  $\geq 2$  weeks. The exposures were performed either between 8 AM and 10 AM or between 10 AM and 12 AM. All exposures (pool environment or filtered air) lasted for 2 hours. The study subject was exercising on a bicycle ergometer with moderate exercise (minute ventilation  $20 \text{ L}\cdot\text{min}^{-1}\cdot\text{m}^{-2}$ ), during 15-minutes followed by 15 minutes of rest, i.e. four periods of exercise and four periods of rest.

***Lung function:***

FVC and forced expiratory volume in 1 sec ( $\text{FEV}_1$ ) was determined using a portable spirometer connected to a computer (KoKo Spirometer and KoKo DigiDoser; Pulmonary Data Service Instrumentation, Inc, Louisville, KY, USA), calibrated in the morning and after every 10<sup>th</sup> measurement.  $\text{FEV}_\%$  was calculated as a percentage of FVC ( $\text{FEV}_\% = \text{FEV}_1 \times 100 / \text{FVC}$ ). Lung function was measured immediately before and after exposure in a room with non-detectable levels of  $\text{NCl}_3$  ( $< 0.002 \text{ mg NCl}_3/\text{m}^3$ ) or in a room adjacent to the exposure chamber.

***Blood sampling and determination of biomarkers.***

We obtained blood samples from the antecubital vein at 0 h and 2 h, i.e. before and after

## LUNG FUNCTION and ASTHMA in POOL ENVIRONMENTS

1  
2  
3 exposure, and at 4, 6 and 8 hours. Peripheral blood was collected into BD Vacutainer tubes  
4  
5 (BD, Plymouth, UK). Each sample was allowed to clot for 1-2 h at room temperature,  
6  
7 centrifuged at 3,000xg and serum was transferred to cryotubes and frozen at -80°C. These  
8  
9 samples were sent to the Industrial Toxicology Unit at the Catholic University of Louvain in  
10  
11 Brussels (IUTUCL), Belgium for determination of Clara Cell protein 16 (CC16) and  
12  
13 Surfactant Protein D (SPD). CC16 was determined by latex immunoassay using a rabbit anti-  
14  
15 CC16 antibody (Dakopatts, Glostrup, Denmark) and CC16 purified at (IUTUCL) as standards  
16  
17 [10,11]. All samples were run in duplicate at two different dilutions. The between- and within-  
18  
19 run coefficients of variation range 5–10% and results are comparable with ELISA methods  
20  
21 [11]. SPD determinations were performed using the Biovendor ELISA kit (Biovendor,  
22  
23 Heidelberg, Germany). Analyses were done in duplicate as recommended by the  
24  
25 manufacturer.  
26  
27  
28  
29

30  
31 Total IgE was determined in human serum by a double antibody sandwich ELISA method  
32  
33 (Human IgE ELISA kit, Immunology Consultants Lab; Inc, Newberg, OR). The quantity of  
34  
35 IgE in the samples was interpolated from a standard curve.  
36  
37  
38  
39  
40  
41

***Statistical analyses***

42  
43 All data from CC16 measurements were corrected for diurnal variation according to Helleday  
44  
45 et al 2006 [12] and recalculated to correspond to 7 AM.  $CC16(\text{corr}) = CC16 + 0.582 * T -$   
46  
47  $0.032 * T^2$ . T is the time after 7.00 AM when the blood sample was taken. Because CC16  
48  
49 values are highest in the morning [12], corrected CC16 values were somewhat greater than  
50  
51 measured values.  
52  
53

54  
55 Statistics: We used repeated measures analyses of variance (Huynh-Feldt corrected) with time  
56  
57 and exposure as within-subject factors and group as between-subject factor. Paired t-test or  
58  
59  
60



## LUNG FUNCTION and ASTHMA in POOL ENVIRONMENTS

1  
2  
3 Wilcoxon signed rank test was used when comparing exposures to filtered air and pool  
4  
5 environment at baseline (0 hrs) and after exercise (2h). Median IgE values were compared by  
6  
7 the Westenberg-Mood median test. SPSS version 17.0 was used to perform the statistical  
8  
9 analyses. A p-value of 0.05 was considered statistically significant.  
10  
11

**Epidemiological study*****Population:***

12  
13  
14  
15  
16  
17  
18  
19  
20  
21 The epidemiological study group included 1741 persons in the Swedish Census of Population  
22  
23 and Housing 1990 who had indicated that they worked at swimming pools. Early 2007 a  
24  
25 questionnaire was mailed to them. There was one reminder.  
26

27  
28  
29  
30  
31  
32  
33  
34  
35  
36  
37  
38  
39  
40  
41  
42  
43  
44  
45  
46  
47  
48  
49  
50  
51  
52  
53  
54  
55  
56  
57  
58  
59  
60  
***Questionnaire:*** Questions dealt with: year hired as a pool worker, time periods in various  
jobs, time spent in swimming pool environments, various symptoms from the respiratory tract  
and mucous membranes of the eyes and possible use of medication for asthma 589 women  
and 513 men, age 30 ->80 years (mean age 51.2 years,SD 12.0) responded (63 %). Among 50  
non-responders, interviews were performed via telephone. There was a lower prevalence of  
asthma and respiratory symptoms among the non-responders, not statistically significant.  
"Self reported asthma" was derived from a positive answer to the following question: "Do  
you suffer from asthma or have you suffered from asthma?" Whether a person's asthma  
started before or after he/she was hired as a pool worker was derived from the combination of  
questions about year hired as pool worker and when the first symptoms of asthma  
occurred.Under the general heading "Acute symptoms when working in a swimming-pool  
environment" there was a question "How large a part of a working day did you usually spend  
in the swimming pool environment Hours"

## LUNG FUNCTION and ASTHMA in POOL ENVIRONMENTS

1  
2  
3 In a nested case-control study within this cohort, 44 cases of self reported asthma occurred  
4  
5 after the person was hired as a pool worker. 128 age and sex matched controls were selected  
6  
7 within the cohort (mean age 50.5 years SD 10.7).  
8  
9

***Exposure assessment:***

10  
11  
12  
13  
14 Based on information on work titles given by each individual, exposure was classified into  
15  
16 three different categories; 0, 1, or 2. 0 stands for no exposure, 1 for low exposure and 2 for  
17  
18 high exposure. The exposure level is not an estimate of the concentration of  $\text{NCl}_3$  in air but is  
19  
20 based on the average time during a workday the individual spent in the pool area. Those  
21  
22 within category 0 did not spend any time in a pool area, e.g. a cashier. A person within  
23  
24 category 1 did occasionally spend some time in the pool area. A manager of a swimming pool  
25  
26 or a technician belongs to this category. Individuals belonging to category 2 were those  
27  
28 spending most of the workday in the pool area, e.g. a swimming teacher, or a swimming pool  
29  
30 worker.  
31  
32  
33  
34  
35  
36  
37  
38  
39  
40  
41  
42

***Statistics***

43  
44  
45  
46 Fisher's test was used to test differences between proportions. Conditional logistic regression  
47  
48 was used for analyses in the nested case-control study and logistic regression for analyses of  
49  
50 asthma in relation to years worked in swimming-pool environments. All statistical analyses  
51  
52 were performed using the statistical package R, version 2.9.0 ( [www.r-project.org](http://www.r-project.org)). P-values  
53  
54 equal to or less than 0.05 were considered statistically significant.  
55  
56  
57  
58  
59  
60

## LUNG FUNCTION and ASTHMA in POOL ENVIRONMENTS

**Ethics**

The project was approved by the Regional ethical review board in Umea, Sweden (Dnr 05-044M) and volunteers provided written informed consent. The study was carried out according to the declaration of Helsinki.

**RESULTS****Air sampling.*****Experimental exposure (Human exposure study)***

The  $\text{NCl}_3$  levels during the experimental exposures were

Group A: Mean  $0.23 \text{ mg/m}^3$  (SD 0.09)

Group B Mean  $0.15 \text{ mg/m}^3$  (SD 0.04)

***Other Swimming pools***

$\text{NCl}_3$  concentrations in air at the 10 different indoor swimming pool establishments were between  $0.001\text{-}0.77 \text{ mg/m}^3$ , median  $0.18 \text{ mg/m}^3$ , arithmetic mean (AM)  $0.21 \text{ mg/m}^3$  ( $n=129$ ). The AM concentrations of  $\text{NCl}_3$  in each of the ten different pool establishments were between  $0.09\text{--}0.32 \text{ mg/m}^3$ . There was no difference in  $\text{NCl}_3$  concentrations during summer compared with winter conditions (results not shown).

**Human exposure study*****Lung function***

Group A:

Measured  $\text{FEV}_1$  volumes among healthy volunteers as well as the difference before and after 2 hours of exposure to pool environment or filtered air are summarized in Table 1. There was

## LUNG FUNCTION and ASTHMA in POOL ENVIRONMENTS

1  
2  
3 a small, statistically significant decrease ( $p=0.01$ ) in FEV<sub>1</sub> (mean decrease = 0.05 L) after  
4 exposure to swimming pool air. After exposure to filtered air there was a slight, not  
5 statistically significant increase in FEV<sub>1</sub> (mean increase 0.01 L). When comparing the  
6 differences ( $\Delta$ -values) in FEV<sub>1</sub> before and after exposure to pool environment with the  $\Delta$ -  
7 values for exposure to filtered air in the same individuals, the difference between  $\Delta$ -values  
8 was statistically significant ( $p=0.01$ ).  
9

10  
11 FEV<sub>%</sub> values among healthy volunteers are also given in table 1. After exposure to pool air,  
12 there was a small decrease (0.8 FEV<sub>%</sub>) that was marginally statistically significant ( $p=0.05$ ).  
13 After exposure to filtered air, there was a small (statistically non-significant) increase in  
14 FEV<sub>%</sub> values. When the individual differences ( $\Delta$ -values) of FEV<sub>%</sub> before and after exposure  
15 to pool air were compared with the corresponding  $\Delta$ -values in filtered air, a statistically  
16 significant difference was demonstrated ( $p=0.004$ , paired t-test). Airway obstruction is usually  
17 defined as FEV<sub>%</sub> below 70 ([www.goldcopd.com](http://www.goldcopd.com)). Only one value was below 70 (after  
18 exposure) among the healthy volunteers.  
19  
20  
21  
22  
23  
24  
25  
26  
27  
28  
29  
30  
31  
32

## Group B

33  
34  
35  
36 In table 2, FEV<sub>1</sub> values for the swimming-pool workers are summarized. After exposure to  
37 pool air there was a small and not statistically significant decrease in FEV<sub>1</sub>, 0.01 L. There was  
38 also a small decrease in FEV<sub>1</sub> after exposure to filtered air (0.05 L,  $p=0.054$ ). When  
39 considering the FEV<sub>%</sub> values for the workers (Table 2) before and after exposure to pool air,  
40 there was a statistically significant decrease of 1.36% ( $p=0.003$ ). After exposure to filtered air  
41 the small decrease in FEV<sub>%</sub> of 0.43% was not statistically significant. Only two FEV<sub>%</sub> values  
42 among the pool workers (one before and one after exposure) were below 70. When comparing  
43 the  $\Delta$ -values in filtered air with those in pool air no statistically significant differences were  
44 found. The lack of such differences may be partly related to the lower exposure level in group  
45 B compared to Group A.  
46  
47  
48  
49  
50  
51  
52  
53  
54  
55  
56  
57  
58  
59  
60

## LUNG FUNCTION and ASTHMA in POOL ENVIRONMENTS

***Biomarkers of pulmonary epithelial integrity:***

## Group A

Mean CC16corr values and related standard deviations (SD) in previously unexposed healthy volunteers, are shown in Figure 1 for 33 of the participants in group A. For the remaining 4 persons, values were missing and they were therefore excluded from analysis.

At baseline (0 hrs), mean CC16corr = 12.6 µg/L before pool exp (0 h) and 10.3 µg/L immediately before (0 h) exposure to filtered air. This difference (p=0.018, paired t-test) is difficult to explain because the same volunteers were exposed to both pool environment and filtered air and they were randomly assigned to either exposure.

## Group B

Results are shown in Table 1. The mean CC16corr was 6.5 µg/L before both pool and filtered air exposures.

The difference between groups A and B persisted during and after exposure (0-8 hrs) and is statistically significant (p<0.001 repeated measures analysis of variance on log transformed data). There is also a different change with time. Group A decreases with time and group B increases with time. The difference in trend is statistically significant p=0.038.

The decrease with time in group A during and after exposure to pool environment as well as filtered air is statistically significant (p<0.05, GLM repeated analysis model). In Group A and Group B there is no statistically significant difference in change with time between pool exposure and filtered air. For improved analysis, values were converted to their natural logarithms, SDs decreased, providing improved statistical conditions, but no statistically significant effect of exposure could be shown (data not shown).

## LUNG FUNCTION and ASTHMA in POOL ENVIRONMENTS

SPD values, shown in Figure 2, also display a change with time, with lower values with increasing time intervals from initiation of exposure. Considering the log transformed SPD variable, there was a difference ( $p < 0.05$ ) before and after exposure (i.e. SPD values were higher at 0 hrs than at 2 hrs) and there was a further decrease ( $p < 0.01$ ) with time at 2 hrs – 8 hrs (Figure 2). This decrease was similar for exposure to pool air and filtered air. In groups A and B we found no statistically significant changes in SPD values in relation to exposure.

### IgE

The median IgE value was low 1.0 mg/L in Group A and 0.0 in group B.

### Epidemiological study

There was a statistically significant relationship between the number of hours, during an average day, spent in the swimming pool environment and the percentage of workers reporting acute symptoms during work ( $p < 0.01$ ; logistic regression). Frequent symptoms were: dyspnoea (13%), cough (23%), nose irritation (29%), throat irritation (24%) and eye irritation (37%).

In the nested case-control study, the Odds Ratio (OR) for asthma was 2.53 (95% CI 0.89 – 7.19) for persons with exposure level 2 (114 controls, 42 cases) compared with persons exposed to level 0 or 1 (14 controls, 2 cases). After correction for heredity, the corresponding numbers were: OR 2.31 (95% CI 0.79-6.74).

These values refer to cases of self reported asthma occurring after they started pool work, compared with controls without asthma.

## LUNG FUNCTION and ASTHMA in POOL ENVIRONMENTS

1  
2  
3 Among individuals who worked more than one year, there was a tendency to a reduced risk of  
4  
5 developing asthma in relation to the number of years of work in swimming-pool  
6  
7 environments. Only asthma cases that occurred after they started to work as pool workers  
8  
9 were considered.. This tendency was, however not, statistically significant  $p=0.07$ .

**Discussion**

16 Our observations of statistically significant decreases in  $FEV_1$  and  $FEV\%$  in previously non-  
17  
18 exposed volunteers and in  $FEV\%$  in pool workers after exposure to pool air are the first such  
19  
20 observations in adults.. Carbonelle et al 2002 [4] reported an increase in  $FEV_1/VC$  among  
21  
22 children and a non-statistically significant decrease in adults ( $n=13$ ) after they had attended a  
23  
24 chlorinated pool. Carbonelle et al 2008 [4] found  $FEV_1/VC$  to be unchanged in 11 young  
25  
26 adults after swimming in a non-chlorinated pool and slightly, but not statistically significantly  
27  
28 decreased after swimming in a chlorinated pool. The lack of statistically significant decrease  
29  
30 may be related to the fact that only 11 adults were studied [4], while the statistically  
31  
32 significant decrease in our study was based on 37 previously unexposed healthy  
33  
34 volunteers. The findings in volunteers were further supported by statistically significant  
35  
36 differences in  $\Delta$ -values. In the 14 pool workers, only one measurement of lung function  
37  
38 ( $FEV\%$ ) was statistically significantly decreased and no statistically significant difference was  
39  
40 seen when  $\Delta$ -values were compared. A possible effect in pool workers at the exposure level of  
41  
42 our study ( $0.15\text{mg}/\text{m}^3$ ) may be considered uncertain. Very few  $FEV\%$  values were below 70  
43  
44 (indicating no clinically significant airway obstruction within the study group). The reduction  
45  
46 in  $FEV\%$  seen after exposure in pool air here, albeit small, may be a sign of an obstructive  
47  
48 airway effect. In children, Bernard et al 2003 [13] found a statistically highly significant  
49  
50 relationship between cumulative pool attendance during kindergarten and PEF 15 (post  
51  
52  
53  
54  
55  
56  
57  
58  
59  
60

## LUNG FUNCTION and ASTHMA in POOL ENVIRONMENTS

1  
2  
3 exercise reduction of peak expiratory flow by 15 percent), providing supportive evidence of  
4  
5 airway effects of exposure to chlorinated pool environments.  
6  
7

8  
9  
10 CC16 levels in serum increase when lung epithelium permeability is adversely affected by air  
11  
12 pollutants or other lung toxicants [6, 10,14,15,]. On the other hand, reduced levels of CC16 in  
13  
14 lung lavage fluid occur in several lung disorders, probably due to a decrease in the production  
15  
16 of CC16 as a consequence of a depletion of Clara cells [16]. We found a statistically  
17  
18 significant difference in the serum level of CC16 between pool workers compared to  
19  
20 volunteers. This finding is consistent with our previous finding of a lower CC16 value in  
21  
22 school children frequently attending indoor swimming pools than in those with a low  
23  
24 attendance at such pools [5]. The difference between workers and previously unexposed  
25  
26 healthy volunteers may be due to the older age of the workers but is more likely due to  
27  
28 repeated exposures because a similar difference occurred among school children and all these  
29  
30 differences may be due to a depletion of Clara cells. We did not find any statistically  
31  
32 significant exposure-related changes in concentrations of the biomarkers of pulmonary  
33  
34 epithelial integrity (CC16 and SPD) after exposure to pool air for 2 hours. The lack of such an  
35  
36 exposure-related change was probably due to the relatively short exposure duration and low  
37  
38 exposure level of  $\text{NCl}_3$ . Another possible explanation is that  $\text{NCl}_3$  acts preferentially in the  
39  
40 more proximal parts of the respiratory tract, inducing a mild constriction of the central  
41  
42 airways, but with less interference in the terminal bronchioles, where the Clara cells are  
43  
44 located. In previous studies of volunteers exposed to ozone [6], we found both a decrease in  
45  
46  $\text{FEV}_1$  and an increase in serum CC16 concentrations after exposure.  
47  
48  
49  
50

51  
52  
53 Ideally, all exposures should have been performed at the same hour, because it is known that  
54  
55 CC16 has diurnal variation [12]. However, for practical reasons exposures were started at  
56  
57  
58  
59  
60



## LUNG FUNCTION and ASTHMA in POOL ENVIRONMENTS

1  
2  
3 somewhat different times during the day and all CC16 values in the present study were  
4  
5 corrected for diurnal variation [12]. Such correction is essential, but introduces a certain  
6  
7 element of uncertainty. In spite of such correction, there was a statistically significant  
8  
9 decrease with time of experiment from 0 h to 8 h in group A (regardless of exposure to NCl<sub>3</sub>).  
10  
11 This indicates that the real diurnal variation exceeded the one assumed in the employed  
12  
13 correction calculation. For group B there is an opposite trend with time, possibly related to an  
14  
15 inadequate correction of the values in this group. The pool workers were older and had been  
16  
17 more exposed to NCl<sub>3</sub> during many years of work in pool environments. . Our data on SPD,  
18  
19 with a statistically significant decrease with time between 0 h and 8 h, confirm previously  
20  
21 reported [17] diurnal variation.  
22  
23

24  
25 The absence of exposure-related effects (after 2 hours exposure) on serum concentrations of  
26  
27 CC16 and SPD in combination with small, statistically significant decreases in FEV<sub>1</sub> and  
28  
29 FEV<sub>%</sub> show that the 2-hour exposure level in this experiment can be regarded as the Lowest-  
30  
31 Observed-Adverse-Effect-Level on the lung for this group of volunteers. It should be borne  
32  
33 in mind that individuals with increased sensitivity to adverse respiratory effects, like those  
34  
35 with pre-existing asthma, were not included in the present study. Our observation may be of  
36  
37 use in relation to administrative action in setting exposure limits for NCl<sub>3</sub>. To our knowledge,  
38  
39 no health-based limit values for occupational or environmental exposures have yet been set  
40  
41 for NCl<sub>3</sub>. A technical value of 0.2 mg/m<sup>3</sup> was recently recommended in Germany [18].  
42  
43

44  
45 Bernard et al 2006 [19] showed that serum total IgE was a factor determining the risk of  
46  
47 adverse pulmonary effects after exposure to pool environments. Serum levels of total IgE in  
48  
49 the volunteers and workers of our study were low. The absence of an increased level of total  
50  
51 serum IgE among the present volunteers indicates that individuals with possibly increased  
52  
53 sensitivity due to increased IgE had been successfully excluded. Further studies on persons  
54  
55 with elevated serum IgE would be of interest. Another group that may suffer respiratory  
56  
57  
58  
59  
60

## LUNG FUNCTION and ASTHMA in POOL ENVIRONMENTS

1  
2  
3 effects at lower air concentrations of  $\text{NCl}_3$  is competitive swimmers because their breathing  
4  
5 volumes exceed those of the volunteers in the present study. Helenius et al 1998 [20] found  
6  
7 increased respiratory symptoms and bronchial responsiveness in elite swimmers.  
8  
9

10  
11 Our study indicates that employees in Swedish indoor pools are exposed to approximately the  
12  
13 same level of  $\text{NCl}_3$  as employees in France and Belgium. We found median  $\text{NCl}_3$   
14  
15 concentrations of  $0.18 \text{ mg/m}^3$  (mean  $0.21 \text{ mg/m}^3$ ) in ten different premises, while Hery et al  
16  
17 1995 [9] reported  $0.14\text{-}0.91 \text{ mg/m}^3$  and Massin et al [3] reported a mean of  $0.24 \text{ mg/m}^3$  in  
18  
19 Public pool environments and  $0.67 \text{ mg/m}^3$  in establishments with private owners. There are no  
20  
21 previous published data on  $\text{NCl}_3$  exposure in Swedish indoor pools. The work environment,  
22  
23 i.e. ventilation and the use of sodium hypochlorite as disinfectant has probably not changed  
24  
25 during the past decades. This makes it reasonable to estimate that pool workers have been  
26  
27 exposed to  $\text{NCl}_3$  at approximately the same levels as reported in this study.  
28  
29  
30  
31

32  
33  
34 In the epidemiological part of the present study, we found a statistically significant  
35  
36 relationship between the number of hours spent in swimming pool environments and the  
37  
38 percentage of workers reporting acute symptoms when working. The percentage varied from  
39  
40 13 percent for dyspnoea to 37 percent for eye irritation. These findings are in accordance with  
41  
42 previous observations in France [3] and Holland [1]. These are subjective symptoms reported  
43  
44 in a questionnaire also collecting exposure information and there is a possibility for recall  
45  
46 bias. However similar clear outcomes have been reported also in other studies [1,3].  
47  
48  
49  
50

51  
52 . Our nested case-referent study found an Odds Ratio (OR) for asthma of 2.53 (95% CI 0.89 –  
53  
54 7.19) for workers with more extensive exposure in pool areas (exposure level 2 compared to  
55  
56 persons with exposure level 0 or 1). After correction for heredity the corresponding numbers  
57  
58  
59  
60

## LUNG FUNCTION and ASTHMA in POOL ENVIRONMENTS

1  
2  
3 were: OR 2.31 (95% CI 0.79 - 6.74). These values refer to cases of self-reported asthma  
4  
5 occurring after they started to work in swimming-pool environments, compared to controls  
6  
7 without asthma.  
8

9  
10 Cases of asthma in pool workers have been reported in the United Kingdom [8], but no  
11  
12 epidemiological evidence has been reported. The findings of the present study did not reach  
13  
14 statistical significance and provide only limited support for a causal relationship between  
15  
16 asthma and work at indoor swimming pools. Individuals who are fit for these type of jobs tend  
17  
18 to exercise more regularly and may notice respiratory symptoms; this may contribute to  
19  
20 confounding. The fact that there was a tendency towards a decreasing risk of asthma in  
21  
22 workers with longer work history may indicate a healthy worker effect due to the irritating  
23  
24 properties of  $\text{NCl}_3$  in pool environments. A recent study [21] reported a higher prevalence  
25  
26 (4.5%) of new-onset asthma among recreational swimmers with >320 hours of cumulative  
27  
28 pool attendance compared to 0.4% among swimmers with <320 hours of pool attendance,  
29  
30 thus supporting a role for exposure at chlorinated pools for development of asthma. In  
31  
32 children engaged in recreational swimming, a statistically significant relationship was shown  
33  
34 between cumulative attendance at indoor swimming pools and the probability of developing  
35  
36 asthma in those with increased total IgE in serum [13,19]. Attendance at chlorinated pools  
37  
38 before the age of 2 years increased the risk of bronchiolitis and asthma [22]  
39  
40  
41  
42  
43  
44

45 The present findings support the previously advanced hypothesis [7, 13, 19,21] that exposures  
46  
47 to  $\text{NCl}_3$  levels commonly occurring in indoor swimming pool environments can cause acute  
48  
49 airway and mucosal symptoms as well as changes in lung function and deterioration of  
50  
51 asthma.  
52  
53  
54  
55  
56  
57  
58  
59  
60

## LUNG FUNCTION and ASTHMA in POOL ENVIRONMENTS

1  
2  
3 **Conclusions:** For the first time in adults, statistically significant but small decreases in lung  
4 function were found in previously unexposed subjects after exposure to pool air containing  
5 0.23 mg/m<sup>3</sup> of NCl<sub>3</sub> compared to filtered air. The changes in lung function occurred in adults  
6 without any signs of allergy and with low IgE values. In a cohort of pool workers we found  
7 exposure-related acute mucous membrane and respiratory symptoms. An increased odds ratio  
8 for asthma (OR 2.31, 95% CI 0.79-6.74) was indicated in workers in the highest exposure  
9 category compared to lower exposures. Our observations give support to a previously  
10 advanced hypothesis that current exposures to NCl<sub>3</sub> can cause adverse effects on mucous  
11 membranes and lungs of humans and contribute to the development of asthma. Further  
12 research in sensitive groups is warranted.  
13  
14  
15  
16  
17  
18  
19  
20  
21  
22  
23  
24  
25  
26

27 **Data sharing:** There is no additional data available  
28  
29  
30  
31

32 **Acknowledgements:** This work was supported by the Swedish Council for Working Life and  
33 Social Research (FAS) project 2004-0497 and the Swedish Research Council for  
34 Environment, Agricultural Sciences and Spatial Planning (FORMAS) project 2005-1561. The  
35 authors declare no competing interests.  
36  
37  
38  
39  
40  
41  
42

43 Author's affiliations  
44

45 G. Nordberg, N-G Lundstrom, B. Forsberg, A Hagenbjork-Gustafsson, B. J-son Lagerkvist,  
46

47 M. Svensson, L. Nilsson, H. Bertilsson and Kåre Eriksson:  
48

49 Department of Public Health and Clinical Medicine, Occupational and Environmental  
50

51 Medicine, Umea University, Umea, Sweden;  
52

53 A. Blomberg:  
54  
55  
56  
57  
58  
59  
60

## LUNG FUNCTION and ASTHMA in POOL ENVIRONMENTS

Department of Public Health and Clinical Medicine, Medicine/Respiratory Medicine, Umea University, Umea, Sweden.

L. Nilsson:

Department of Mathematical Statistics, Umea University, Umea, Sweden.

A. Bernard, X. Dumont:

Unit of Industrial Toxicology and Occupational Health, Catholic University of Louvain, Brussels, Belgium

**Competing Interests Statement**

There are no competing interests.

**References**

1. Jacobs J H, Spaan S, van Rooy GB et al. Exposure to trichloramine and respiratory symptoms in indoor swimming pool workers. *Eur Respir J.* 2007 ; 29: 690-698.
2. Bowen AB, Kile JC, Otto C et al. Outbreaks of short-incubation ocular and respiratory illness following exposure to indoor swimming pools. *Environ Health Perspect* 2007; 115 : 267-71.
3. Massin N, Bohadana AB, Wild P et al. Respiratory symptoms and bronchial responsiveness in lifeguards exposed to nitrogen trichloride in indoor swimming pools. *Occup Environ Med* 1998; 55: 258-263.

## LUNG FUNCTION and ASTHMA in POOL ENVIRONMENTS

- 1  
2  
3 4.. Carbonnelle S, Francaux M, Doyle I et al. Changes in serum pneumoproteins caused by  
4  
5 short-term exposures to nitrogen trichloride in indoor chlorinated swimming pools.  
6  
7 *Biomarkers*, 2002 ;7 :464-478.  
8  
9
- 10  
11 5.. Carbonnelle S, Bernard A, Doyle IR,et al. Fractional exhaled NO and serum pneumo-  
12  
13 proteins after swimming in a chlorinated pool. *Med Sci Sports Exerc.* 2008 ;40:1472-6.  
14  
15
- 16  
17  
18 6. Blomberg A, Mudway I, Svensson M et al. Clara cell protein as a biomarker for ozone –  
19  
20 induced lung injury in humans. *Eur Respir. J.* 2003 ;22 :883-888.  
21  
22
- 23  
24  
25 7.. Lagerkvist BJ, Bernard A, Blomberg A et al.. Pulmonary epithelial integrity in children :  
26  
27 relationship to ambient ozone exposure and swimming pool attendance. *Environ Health*  
28  
29 *Perspect* 2004; 112: 1768-1771.  
30  
31
- 32  
33  
34 8. Thickett KM, McCord JS, Gerber JM et al. Occupational Asthma caused by Chloramines  
35  
36 in indoor swimming-pool air. *Eur Respir J* 2002 ;19 :827-32  
37  
38
- 39  
40  
41 9. Hery M, Hecht G, Gerber JM et al. Exposure to chloramines in the atmosphere of indoor  
42  
43 swimming pools. *Ann Occup Hyg* 1995; 39:427-439.  
44  
45
- 46  
47  
48 10. Bernard A, Marchandise FX, Depelchin S et al Clara cell protein in serum and  
49  
50 bronchalveolar lavage. *Eur Resp J.* 1992 ; 5 :1231-1238.  
51  
52
- 53  
54  
55 11. Hermans C, Aly O, Nyberg BI et al. Determinants of Clara cell protein (CC16)  
56  
57 concentration in serum: a reassessment with two different immunoassays. *Clin Chim Acta*  
58  
59 1998 ; 272: 101-110.  
60

## LUNG FUNCTION and ASTHMA in POOL ENVIRONMENTS

1  
2  
3  
4  
5 12. Helleday R, Segerstedt B, Forsberg B et al. Exploring the time dependence of serum Clara  
6 cell protein as a biomarker of pulmonary injury in humans. *Chest*, 2006 ; 130: 672-675.  
7  
8

9  
10  
11  
12  
13  
14 13 Bernard A, Carbonelle S, Michel O et al. Lung hyperpermeability and asthma prevalence  
15 in schoolchildren : unexpected associations with the attendance at indoor chlorinated  
16 swimming pools. *Occup Environ Med* 2003 ;60 :385-94.  
17  
18  
19

20  
21  
22  
23 14. Hermans C, Bernard A. Clara cell protein: characteristics and potential applications as  
24 marker of lung toxicity. *Biomarkers* 1996; 1:3-8.  
25  
26  
27

28  
29  
30 15. Broeckaert F, Arsalane K, Hermans C et al. Lung epithelial damage at low concentrations  
31 of ambient ozone. *Lancet* 1999; 353:900-901.  
32  
33  
34

35  
36 16. Hermans C and Bernard A State of the Art. Lung Epithelium-specific Proteins.  
37 Characteristics and potential applications as markers. *Am J Respir Crit Care Med* 1999;  
38 159:646-678.  
39  
40  
41

42  
43 17. Hoegh SV, Sorensen GL, Tornoe I et al . Long-term stability and circadian variation in  
44 circulating levels of surfactant protein D. *Immunobiology*.2010, 215:314-320.  
45  
46  
47

48 18. German Working Group on Indoor Guide Values of the Federal Environment Agency,  
49 Risk assessment of trichloramine in the air of indoor swimming pools. *Bundesgesundheitsbl*.  
50 2011 ; 54 :997 -1004 [in German with abstract in English]  
51  
52  
53  
54  
55  
56  
57  
58  
59  
60

## LUNG FUNCTION and ASTHMA in POOL ENVIRONMENTS

- 1  
2  
3 19. Bernard A, Carbonnelle S, De Burbure C et al. Chlorinated pool attendance, atopy, and  
4  
5 the risk of asthma during childhood. *Environ Health Perspect* 2006 ;114 : 1567-73.  
6  
7  
8 20. Helenius IJ, Tikkanen HO, Sarna S et al. Astma and increased bronchial responsiveness  
9  
10 in elite athletes: atopy and sports event as risk factors. *J Allergy Clin Immunol* 1998,  
11  
12 101, 646-52  
13  
14  
15  
16 21. Ferrari M, Schenk K, Mantovani W et al. Attendance at chlorinated indoor pools and risk  
17  
18 of asthma in adult recreational swimmers. *J Sci Med Sport*. 2011; 14: 184-189.  
19  
20  
21  
22  
23  
24 22. Viosin C, Sardella A, Marcucci F et al. Infant swimming in chlorinated pools and the risk  
25  
26 of bronchiolitis, asthma and allergy. *Eur. Resp J* 2010 ; 36 : 41-47  
27  
28  
29  
30  
31  
32  
33  
34  
35  
36  
37  
38  
39  
40  
41  
42  
43  
44  
45  
46  
47  
48  
49  
50  
51  
52

53 **Figures and Tables** **Table 1.** Healthy volunteers (n=37): FEV<sub>1</sub> (forced expiratory volume,  
54 liter during 1 sec) and FEV<sub>%</sub> (FEV<sub>1</sub>x100/forced vital capacity) measured before and after 2h  
55 exercise in filtered air and pool air respectively. Mean  $\pm$  SD. Mean differences (before-after)  
56 within parentheses.  
57  
58  
59  
60



## LUNG FUNCTION and ASTHMA in POOL ENVIRONMENTS

1  
2  
3 [Separate file]  
4  
5  
6  
7  
8  
9  
10

11 **Table 2.** Swimming pool workers (n=14): FEV<sub>1</sub> (forced expiratory volume, liter during 1 sec)  
12 and FEV<sub>%</sub> (FEV<sub>1</sub>×100/forced vital capacity) measured before and after 2h exercise in filtered  
13 air and pool air respectively. Mean ± SD. Mean differences (before-after) within parentheses.  
14  
15

16 [Separate file]  
17  
18  
19  
20  
21

**Figure legends**

22  
23  
24 Figure 1: Mean values (µg/L) and SD for CC16corr at various time points before (0h),  
25 immediately after exposure (2h) and the following 2 (4h), 4 (6h) and 6 hours (8h).  
26 Values are shown for the previously unexposed group of healthy volunteers (A) after  
27 exposure in a pool environment, after exposure to filtered air (two upper set of lines and bars).  
28 The two lower lines and related bars represent exposure in pool environment and filtered air  
29 for Group B, recruited among pool workers with several years exposure to pool environments.  
30  
31

32  
33  
34  
35 Figure 2: Mean and SD for measured SPD values (µg/L) at various time points (0-8 hours)  
36 of the study. Exposure to pool environment or filtered air took place for 2 hours (between 0h  
37 and 2h). Group A: previously unexposed healthy volunteers. Group B: pool workers  
38  
39  
40  
41

42 Fig 1 (separate file)  
43  
44  
45  
46

47 Fig 2(separate file)  
48  
49  
50  
51  
52  
53  
54  
55  
56  
57  
58  
59  
60

## LUNG FUNCTION and ASTHMA in POOL ENVIRONMENTS

**Statement:**

The Corresponding Author has the right to grant on behalf of all authors and does grant on behalf of all authors, an exclusive license (or non-exclusive for government employees) on a worldwide basis to the BMJ Group and co-owners or contracting owning societies (where published by the BMJ Group on their behalf), and its Licensees to permit this article (if accepted) to be published in Occupational and Environmental Medicine and any other BMJ Group products and to exploit all subsidiary rights, as set out in our license."

**Contributorship statement:**

"The contributions of the authors are as follows: G.Nordberg 1,2,3; N-G.Lundstrom 1,2,3; B.Forsberg1,2,3; A.Hagenbjork-Gustafsson1,2,3; B. J-son Lagerkvist1,2,3; J. Nilsson1,2,3; M.Svensson1,2,3; A.Blomberg1, 2,3; L. Nilsson1,2,3; A. Bernard1,2,3; X. Dumont1,2,3; H.Bertilsson1,2,3 and K. Eriksson1,2,3.

1) substantial contributions to conception and design, acquisition of data, or analysis and interpretation of data; 2) drafting the article or revising it critically for important intellectual content; and 3) final approval of the version to be published."

## LUNG FUNCTION and ASTHMA in POOL ENVIRONMENTS

20120802334

**Lung function in volunteers before and after exposure to trichloramine in indoor pool environments and asthma in a cohort of pool workers**

G. Nordberg, N-G. Lundstrom, B. Forsberg, A. Hagenbjork-Gustafsson, B. J-son Lagerkvist, J. Nilsson, M. Svensson, A. Blomberg, L. Nilsson, A. Bernard, X. Dumont, H. Bertilsson and K. Eriksson

Address correspondence to G. Nordberg, Department of Public Health and Clinical Medicine, Umea University, SE-90187 Umea, Sweden. Telephone. +46 90 7852727. E-mail [gunnar.nordberg@envmed.umu.se](mailto:gunnar.nordberg@envmed.umu.se)

List of abbreviations:

- CC16: Clara Cell protein 16
- FEV<sub>1</sub>: Forced Expiratory Volume in 1 second, liters
- FEV<sub>1%</sub>: FEV<sub>1</sub>x100/FVC
- FVC: Forced Vital Capacity, liter
- NCl<sub>3</sub>: Nitrogen trichloride or trichloramine
- OR: Odds Ratio
- RHINE: Respiratory Health in Northern Europe
- SPD: Surfactant protein D

1  
2  
3  
4 LUNG FUNCTION and ASTHMA in POOL ENVIRONMENTS  
5  
6

7 **Summary:**  
8

9  
10 **1) Article focus:**

11 # Exposure to trichloramine (NCl<sub>3</sub>) in swimming-pool air is known to cause mucous  
12 membrane and pulmonary effects, but statistically significant changes in lung function among  
13 adults have not been reported.  
14  
15

16  
17 # Epidemiological studies of asthma among pool workers are not available.  
18  
19

20 **2) Key messages:**  
21

22 # In this study we found for the first time, statistically significant decreases in lung function  
23 in volunteers after exposure to pool air with commonly occurring levels of NCl<sub>3</sub>.  
24  
25

26 # We found a tendency towards a higher odds ratio (OR) for asthma in a nested case  
27 reference study within a cohort of 1102 pool workers.  
28  
29

30 # Our findings support the notion that current workroom exposures of NCl<sub>3</sub> may contribute to  
31 asthma development.  
32  
33

34 **3) Strengths and limitations:** This is the first study showing small but statistically significant  
35 decreases in lung function after exposure to pool air. This is the first nested Case/Control  
36 study in pool workers. It reports an OR for asthma of 2.31 (95% CI 0.79-6.74) among pool  
37 workers with the highest exposure (after correction for heredity), but this finding did not reach  
38 statistical significance.  
39  
40  
41  
42  
43  
44  
45  
46  
47  
48  
49  
50  
51  
52  
53  
54  
55  
56  
57  
58  
59  
60

## LUNG FUNCTION and ASTHMA in POOL ENVIRONMENTS

**ABSTRACT**

**Objectives:** Exposure to trichloramine ( $\text{NCl}_3$ ) in indoor swimming pool environments is known to cause mucous membrane irritation, but if it gives rise to changes in lung function or asthma in adults is not known. 1: We determined lung function in volunteers before and after exposure to indoor pool environments 2: We studied the occurrence of respiratory symptoms and asthma in a cohort of pool workers.

**Design/Methods/Participants:** 1. We studied two groups of volunteers, 37 previously non-exposed healthy persons and 14 pool workers, who performed exercise for two hours in an indoor pool environment.  $\text{NCl}_3$  in air was measured during pool exposures and in 10 other pool environments. Filtered air exposures were used as controls. Lung function and biomarkers of pulmonary epithelial integrity were measured before and after exposure. 2. We mailed a questionnaire to 1741 persons who indicated in the Swedish census 1990 that they worked at indoor swimming-pools.

**Results:** 1. In previously non-exposed volunteers, statistically significant decreases in  $\text{FEV}_1$  and  $\text{FEV}_\%$  ( $p=0.01$  and  $p=0.05$  respectively) were found after exposure to pool air ( $0.23 \text{ mg/m}^3$  of  $\text{NCl}_3$ ). In pool workers, a statistically significant decrease in  $\text{FEV}_\%$  ( $p=0.003$ ) was seen (but no significant change of  $\text{FEV}_1$ ) after exposure to  $0.15 \text{ mg/m}^3$  of  $\text{NCl}_3$ . In the 10 other pool environments the median  $\text{NCl}_3$  concentration was  $0.18 \text{ mg/m}^3$ . 2. Our nested Case/Control study in pool workers found an OR for asthma of 2.31 (95% CI 0.79-6.74) among those with the highest exposure. Exposure-related acute mucous membrane and respiratory symptoms were also found.

**Conclusions:** This is the first study in adults showing statistically significant decreases in lung function after exposure to  $\text{NCl}_3$ . An increased OR for asthma among highly exposed pool workers did not reach statistical significance, but the combined evidence supports the

Formatted: Subscript

## LUNG FUNCTION and ASTHMA in POOL ENVIRONMENTS

notion that current workroom exposures may contribute to asthma development. Further research on sensitive groups is warranted.

### INTRODUCTION and OBJECTIVES

Mono-, di- and trichloramines are formed following a reaction between ammonia ( $\text{NH}_3$ ) or other nitrogen containing substances present in swimming pool water when hypochlorite is used as a disinfectant. Trichloramine ( $\text{NCl}_3$ ) is the most volatile chloramine and is emitted into the air of indoor swimming pools. Exposure to this substance was the suspected cause of outbreaks of short-incubation ocular and respiratory illness [1,2], but concentrations of  $\text{NCl}_3$  in pool environments were not known in these outbreaks. It is known, however, that acute respiratory and eye symptoms may occur among recreational swimmers in relation to measured levels of  $\text{NCl}_3$  in pool environments [3] [and  \$\text{NCl}\_3\$  is considered to be the causative agent.](#)

Formatted: Subscript

Only few and inconclusive studies have been performed on lung function among adults after exposures to measured levels of  $\text{NCl}_3$  in pool environments [4,5] and additional studies are required.

Clara cell protein 16 (CC16) is an epithelial protective protein in peripheral lung tissue and changes in its serum levels are used as a biomarker of epithelial integrity [6]. It has been shown to be decreased in relation to frequency of pool attendance [7]. However, changes in serum levels of CC16 have not been studied after short term exposure to  $\text{NCl}_3$ .

Thickett et al 2002 [8] reported three cases of occupational asthma among British pool workers exposed to  $\text{NCl}_3$ . There is a lack of epidemiological studies on asthma among those working in swimming pool environments.

## LUNG FUNCTION and ASTHMA in POOL ENVIRONMENTS

The objectives of the present study were 1. To perform a controlled human exposure study of lung function and biomarkers of pulmonary epithelial integrity in volunteers before and after exposure to indoor swimming pool environments. 2. To perform an epidemiological study of self-reported asthma and subjective symptoms in a cohort of indoor swimming pool workers

## DESIGN, MATERIALS AND METHODS

### **Air sampling and determination of $\text{NCl}_3$ :**

#### *Exposure measurements in human exposure study*

In the two pool environments where our study of volunteers and pool-workers took place hypochlorite was used as disinfectant. Air samples were collected in the breathing zone: one sample for each 2-hour exposure, in total 51 samples.

#### *Determination of $\text{NCl}_3$ at other indoor swimming pools:*

Additional determinations of  $\text{NCl}_3$  were performed 2004-2008 at 10 different pool establishments (7 conventional ones and 3 "adventure water lands") in northern Sweden with totally 30 indoor pools. Hypochlorite was used as disinfectant. At each swimming-pool, air was sampled during 3 hours at 3 to 4 different locations in close vicinity of the pool. The equipment was mounted on a stand with the filter at a height of approximately 1.5 meter. Sampling was performed on three different days during winter and three different days during summer.

## LUNG FUNCTION and ASTHMA in POOL ENVIRONMENTS

**Air collection and Analysis:** 1L/min of air was pumped through a filter (quartz filter QM-A 37 mm Whatman International Ltd., Maidstone, England). The filter was soaked in a solution of sodium carbonate and arsenic trioxide ( $\text{AsO}_3$ ) and dried as presented earlier [9]. When  $\text{NCl}_3$  is collected on the filter it is reduced to chloride ion ( $\text{Cl}^-$ ) [9]. After sampling, the filters were extracted with 10 ml of ultra-pure water, shaken for 30 minutes and filtered through a 13 mm syringe filter (IC Acrodisc®, PALL). The chlorides were analyzed in a suppressed ion chromatography system (Triatlon 900 autosampler, Spark, The Netherlands); IC Sep AN1, Anion column (CETAC, Omaha, USA); SCX membrane suppressor column (Sequant, Umeå, Sweden); JD-21 conductivity detector (Costech Microanalytical Ltd, Tallin, Estonia)). The eluent was 7.5 mM NaOH and the suppressor 5 mM  $\text{H}_2\text{SO}_4$ . Control samples of two known chloride concentrations ( $0.5$ ,  $3.0 \text{ mg l}^{-1}$ ) and at least two blanks were run together with the samples in each run. The chloride concentrations in the blanks were subtracted from the concentration in the samples. The detection limits of  $\text{NCl}_3$  ( $1.78$  and  $1.18 \text{ } \mu\text{g m}^{-3}$  for 2 h and 3 h samplings, respectively) were determined as three times the mean standard deviation of the amount collected on filters of 10 blanks. The limits of quantification ( $5.9 \text{ } \mu\text{g m}^{-3}$  and  $3.9 \text{ } \mu\text{g m}^{-3}$  for 2 h and 3 h samplings respectively) were determined as ten times the mean standard deviation for the same blanks.

### Human exposure study

#### Study groups:

Group A: 37 healthy subjects (20 men and 17 women, mean age 24.5 years). They were not regular swimming pool visitors and they had not visited a swimming pool within four weeks before study start.

Group B: 14 workers at swimming pools (5 men, 9 women, mean age 39.9 years).



## LUNG FUNCTION and ASTHMA in POOL ENVIRONMENTS

All participants were non-smokers with normal lung function and had no history of allergy or pre-existing lung disease. Subjects were free of airway infection for  $\geq 4$  weeks prior to the first exposure and throughout the remainder of the study.

### *Study design*

The study was conducted in a crossover control fashion. Each volunteer was exposed to filtered air in an exposure chamber and on another occasion to an indoor pool environment. In the exposure chamber, located in a separate building away from swimming-pools, incoming air was adjusted to room temperature and filtered through a particle filter. The exposures were performed in random order. Successive exposures were separated by  $\geq 2$  weeks. The exposures [were performed either between 8AM and 10 AM or between 10 Am and 12 AM. All exposures](#) (pool environment or filtered air) lasted for 2 hours. The study subject was exercising on a bicycle ergometer with moderate exercise (minute ventilation  $20 \text{ L}\cdot\text{min}^{-1}\cdot\text{m}^{-2}$ ), during 15-minutes followed by 15 minutes of rest, i.e. four periods of exercise and four periods of rest.

### *Lung function:*

FVC and forced expiratory volume in 1 sec ( $\text{FEV}_1$ ) was determined using a portable spirometer connected to a computer (KoKo Spirometer and KoKo DigiDoser; Pulmonary Data Service Instrumentation, Inc, Louisville, KY, USA), calibrated in the morning and after every 10<sup>th</sup> measurement.  $\text{FEV}_\%$  was calculated as a percentage of FVC ( $\text{FEV}_\% = \text{FEV}_1 \times 100 / \text{FVC}$ ). Lung function was measured immediately before and after exposure in a room with non-detectable levels of  $\text{NCl}_3$  ( $< 0.002 \text{ mg NCl}_3/\text{m}^3$ ) or in a room adjacent to the exposure chamber.

## LUNG FUNCTION and ASTHMA in POOL ENVIRONMENTS

***Blood sampling and determination of biomarkers.***

We obtained blood samples from the antecubital vein at 0 h and 2 h, i.e. before and after exposure, and at 4, 6 and 8 hours. Peripheral blood was collected into BD Vacutainer tubes (BD, Plymouth, UK). Each sample was allowed to clot for 1-2 h at room temperature, centrifuged at 3,000xg and serum transferred to cryotubes and frozen at -80°C. These samples were sent to the Industrial Toxicology Unit at the Catholic University of Louvain in Brussels (IUTUCL), Belgium for determination of Clara Cell protein 16 (CC16) and Surfactant Protein D (SPD). CC16 was determined by latex immunoassay using a rabbit anti-CC16 antibody (Dakopatts, Glostrup, Denmark) and CC16 purified at (IUTUCL) as standards [10,11]. All samples were run in duplicate at two different dilutions. The between- and within-run coefficients of variation range 5–10% and results are comparable with ELISA methods [112]. SPD determinations were performed using the Biovendor ELISA kit (Biovendor, Heidelberg, Germany). Analyses were done in duplicate as recommended by the manufacturer.

Total IgE was determined in human serum by a double antibody sandwich ELISA method (Human IgE ELISA kit, Immunology Consultants Lab; Inc, Newberg, OR). The quantity of IgE in the samples was interpolated from a standard curve.

***Statistical analyses***

All data from CC16 measurements were corrected for diurnal variation according to Helleday et al 2006 [123] and recalculated to correspond to 7 AM.  $CC16(\text{corr}) = CC16 + 0.582 * T - 0.032 * T^2$ . T is the time after 7.00 AM when the blood sample was taken. Because CC16 values are highest in the morning [123], corrected CC16 values were somewhat greater than measured values.

## LUNG FUNCTION and ASTHMA in POOL ENVIRONMENTS

Statistics: We used repeated measures analyses of variance (Huynh-Feldt corrected) with time and exposure as within-subject factors and group as between-subject factor. Paired t-test or Wilcoxon signed rank test was used when comparing exposures to filtered air and pool environment at baseline (0 hrs) and after exercise (2h). Median IgE values were compared by the Westenberg-Mood median test. SPSS version 17.0 was used to perform the statistical analyses. A p-value of 0.05 was considered statistically significant.

### **Epidemiological study**

#### ***Population:***

The epidemiological study group included 1741 persons in the Swedish Census of Population and Housing 1990 who had indicated that they worked at swimming pools. Early 2007 a questionnaire was mailed to them. There was one reminder.

***Questionnaire:*** Questions dealt with: [year hired as a pool worker](#), -time periods in various jobs, time spent in swimming pool environments, various symptoms from the respiratory tract and mucous membranes of the eyes and possible use of medication for asthma- 589 women and 513 men, age 30 ->80 years ([mean age 51.2 years,SD 12.0](#)) responded ([63 %](#)). Among 50 non-responders, interviews were performed via telephone. There was a lower prevalence of asthma and respiratory symptoms among the non-responders,- not statistically significant.

["Self reported asthma" was derived from a positive answer to the following question: "Do you suffer from asthma or have you suffered from asthma?" Whether a person's asthma started before or after he/she was hired as a pool worker was derived from the combination of questions about year hired as pool worker and when the first symptoms of asthma occurred.Under the general heading "Acute symptoms when working in a swimming-pool](#)

## LUNG FUNCTION and ASTHMA in POOL ENVIRONMENTS

[environment” there was a question “How large a part of a working day did you usually spend in the swimming pool environment Hours”](#)

In a nested case-control study within this cohort, 44 cases of self reported asthma occurred after the person was hired as a pool worker. 128 age and sex matched controls were selected within the cohort ([mean age 50.5 years SD 10.7](#)).

***Exposure assessment:***

Based on information on work titles given by each individual, exposure was classified into three different categories; 0, 1, or 2. 0 stands for no exposure, 1 for low exposure and 2 for high exposure. The exposure level is not an estimate of the concentration of  $\text{NCl}_3$  in air but is based on the average time during a workday the individual spent in the pool area. Those within category 0 did not spend any time in a pool area, e.g. a cashier. A person within category 1 did occasionally spend some time in the pool area. A manager of a swimming pool or a technician belongs to this category. Individuals belonging to category 2 were those spending most of the workday in the pool area, e.g. a swimming teacher, or a swimming pool worker.

***Comparison data***

~~We obtained data on asthma in 1990 from the study “Respiratory Health in Northern Europe” (RHINE [14]) via one of the authors of the present paper (BF). As we used the same questions in the present study as in RHINE, it was possible to derive adequate sex and age stratified comparison data up to the age of 55.~~

## LUNG FUNCTION and ASTHMA in POOL ENVIRONMENTS

### **Statistics**

Fisher's test was used to test differences between proportions. Conditional logistic regression was used for analyses in the nested case-control study and logistic regression for analyses of asthma in relation to years worked in swimming-pool environments. All statistical analyses were performed using the statistical package R, version 2.9.0 ([www.r-project.org](http://www.r-project.org)). P-values equal to or less than 0.05 were considered statistically significant.

### **Ethics**

The project was approved by the Regional ethical review board in Umea, Sweden (Dnr 05-044M) and volunteers provided written informed consent. The study was carried out according to the declaration of Helsinki.

## **RESULTS**

### **Air sampling.**

#### ***Experimental exposure (Human exposure study)***

The  $\text{NCl}_3$  levels during the experimental exposures were

Group A: Mean  $0.23 \text{ mg/m}^3$  (SD 0.09)

Group B Mean  $0.15 \text{ mg/m}^3$  (SD 0.04)

#### ***Other Swimming pools***

$\text{NCl}_3$  concentrations in air at the 10 different indoor swimming pool establishments were

between  $0.001\text{-}0.77 \text{ mg/m}^3$ , median  $0.18 \text{ mg/m}^3$ , arithmetic mean (AM)  $0.21 \text{ mg/m}^3$

( $n=129$ ). The AM concentrations of  $\text{NCl}_3$  in each of the ten different pool establishments were

## LUNG FUNCTION and ASTHMA in POOL ENVIRONMENTS

between 0.09 – 0.32 mg/m<sup>3</sup>. There was no difference in NCl<sub>3</sub> concentrations during summer compared with winter conditions (results not shown).

### **Human exposure study**

#### ***Lung function***

Group A:

Measured FEV<sub>1</sub> volumes among healthy volunteers as well as the difference before and after 2 hours of exposure to pool environment or filtered air are summarized in Table 1. There was a small, statistically significant decrease (p=0.01) in FEV<sub>1</sub> (mean decrease = 0.05 L) after exposure to swimming pool air. After exposure to filtered air there was a slight, not statistically significant increase in FEV<sub>1</sub> (mean increase 0.01 L). When comparing the differences (Δ-values) in FEV<sub>1</sub> before and after exposure to pool environment with the Δ-values for exposure to filtered air in the same individuals, the difference between Δ-values was statistically significant (p=0.01).

FEV<sub>1</sub> values among healthy volunteers are also given in table 1. After exposure to pool air, there was a small decrease (0.8 FEV<sub>1</sub>) that was marginally statistically significant (p=0.05). After exposure to filtered air, there was a small (statistically non-significant) increase in FEV<sub>1</sub> values. When the individual differences (Δ-values) of FEV<sub>1</sub> before and after exposure to pool air were compared with the corresponding Δ-values in filtered air, a statistically significant difference was demonstrated (p=0.004, paired t-test). Airway obstruction is usually defined as FEV<sub>1</sub> below 70 ([www.goldcopd.com](http://www.goldcopd.com)). Only one value was below 70 (after exposure) among the healthy volunteers.

Group B

In table 2, FEV<sub>1</sub> values for the swimming-pool workers are summarized. After exposure to pool air there was a small and not statistically significant decrease in FEV<sub>1</sub>, 0.01 L. There was

## LUNG FUNCTION and ASTHMA in POOL ENVIRONMENTS

also a small decrease in FEV<sub>1</sub> after exposure to filtered air (0.05 L, p=0.054). When considering the FEV<sub>%</sub> values for the workers (Table 2) before and after exposure to pool air, there was a statistically significant decrease of 1.36% (p=0.003). After exposure to filtered air the small decrease in FEV<sub>%</sub> of 0.43% was not statistically significant. Only two FEV<sub>%</sub> values among the pool workers (one before and one after exposure) were below 70. [When comparing the Δ-values in filtered air with those in pool air no statistically significant differences were found. The lack of such differences may be partly related to the lower exposure level in group B compared to Group A.](#)

***Biomarkers of pulmonary epithelial integrity:***

## Group A

Mean CC16corr values and related standard deviations (SD) in previously unexposed healthy volunteers, are shown in Figure 1 for 33 of the participants in group A. For the remaining 4 persons, values were missing and they were therefore excluded from analysis.

At baseline (0 hrs), mean CC16corr = 12.6 µg/L before pool exp (0 h) and 10.3 µg/L immediately before (0 h) exposure to filtered air. This difference (p=0.018, paired t-test) is difficult to explain because the same volunteers were exposed to both pool environment and filtered air and they were randomly assigned to either exposure.

## Group B

Results are shown in Table 1. The mean CC16corr was 6.5 µg/L before both pool and filtered air exposures.

The difference between groups A and B persisted during and after exposure (0-8 hrs) and is statistically significant (p<0.001 repeated measures analysis of variance on log transformed

## LUNG FUNCTION and ASTHMA in POOL ENVIRONMENTS

data). There is also a different change with time. Group A decreases with time and group B increases with time. The difference in trend is statistically significant  $p=0.038$ .

The decrease with time in group A during and after exposure to pool environment as well as filtered air is statistically significant ( $p<0.05$ , GLM repeated analysis model). [In Group A and Group B](#) there is no statistically significant difference in change with time between pool exposure and filtered air. For improved analysis, values were converted to their natural logarithms, SDs decreased, providing improved statistical conditions, but no statistically significant effect of exposure could be shown (data not shown).

SPD values, shown in Figure 2, also display a change with time, with lower values with increasing time intervals from initiation of exposure. Considering the log transformed SPD variable, there was a difference ( $p<0.05$ ) before and after exposure (i.e. SPD values were higher at 0 hrs than at 2 hrs) and there was a further decrease ( $p<0.01$ ) with time at 2 hrs – 8 hrs (Figure 2). This decrease was similar for exposure to pool air and filtered air. [In groups A and B](#) we found no statistically significant changes in SPD values in relation to exposure.

### IgE

The median IgE value was [low](#) 1.0 mg/L in Group A and 0.0 in group B, ~~compared to 3.0 mg/L in mild asthmatics (n=18) participating in another study on influence of general air pollution conducted by one of the authors (BF). Compared to the volunteers in the present study (groups A and B), the median value of the asthmatics was statistically significantly higher ( $p=0.002$ ) based on Westenberg-Mood median test.~~

### Epidemiological study



## LUNG FUNCTION and ASTHMA in POOL ENVIRONMENTS

There was a statistically significant relationship between the number of hours, during an average day, spent in the swimming pool environment and the [percentage of workers reporting incidence of acute symptoms during work](#) ( $p < 0.01$ ; logistic regression). Frequent symptoms were: dyspnoea (13%), cough (23%), nose irritation (29%), throat irritation (24%) and eye irritation (37%).

~~The prevalence of self reported asthma attacks or medication for asthma was higher ( $p < 0.01$ ; Fisher's test) among swimming pool workers in this study (12.3%) compared with the reference group 8.1% (RHINE 1999). When considering rates (age and sex adjusted) by logistic regression, there was still a higher prevalence among swimming pool workers, but less significant ( $p = 0.11$ ).~~

In the nested case-control study, the Odds Ratio (OR) for asthma was 2.53 (95% CI 0.89 – 7.19) for persons with exposure level 2 ([114 controls, 42 cases](#)) compared with persons exposed to level 0 or 1 ([14 controls, 2 cases](#)). After correction for heredity, the corresponding numbers were: OR 2.31 (95% CI 0.79-6.74).

These values refer to cases of self reported asthma occurring after they started pool work, compared with controls [without asthma](#).

~~Among individuals who worked more than one year, there was a~~ tendency to a reduced risk of developing asthma in relation to the number of years of work in swimming-pool environments. ~~was indicated among individuals who worked more than one year and d~~ [Only asthma cases that occurred developed asthma](#) after they started to work ~~in as pool workers were considered, such environments~~. This tendency was, however not, statistically significant  $p = 0.07$ .

## LUNG FUNCTION and ASTHMA in POOL ENVIRONMENTS

**Discussion**

Our observations of statistically significant decreases in FEV<sub>1</sub> and FEV% in previously non-exposed volunteers and in FEV% in pool workers after exposure to pool air are the first such observations in adults. Carbonelle et al 2002 [4] reported an increase in FEV<sub>1</sub>/VC among children and a non-statistically significant decrease in adults (n=13) after they had attended a chlorinated pool. Carbonelle et al 2008 [4] found FEV<sub>1</sub>/VC to be unchanged in 11 young adults after swimming in a non-chlorinated pool and slightly, but not statistically significantly decreased after swimming in a chlorinated pool. The lack of statistically significant decrease may be related to the fact that only 11 adults were studied [4], while the statistically significant decrease in our study was based on 37 previously unexposed healthy volunteers. The findings in volunteers were further supported by statistically significant differences in Δ-values. In the 14 pool workers, only one measurement of lung function (FEV%) was statistically significantly decreased and no statistically significant difference was seen when Δ-values were compared. A possible effect in pool workers at the exposure level of our study (0.15mg/m<sup>3</sup>) may be considered uncertain. Very few FEV% values were below 70 (indicating no clinically significant airway obstruction within the study group). The reduction in FEV% seen after exposure in pool air here, albeit small, may be a sign of an obstructive airway effect. In children, Bernard et al 2003 [143] found a statistically highly significant relationship between cumulative pool attendance during kindergarten and PEF 15 (post exercise reduction of peak expiratory flow by 15 percent), providing supportive evidence of airway effects of exposure to chlorinated pool environments. —

CC16 levels in serum increase when lung epithelium permeability is adversely affected by air pollutants or other lung toxicants [6, 10, 14, 15, 16]. On the other hand, reduced levels of CC16

Formatted: Superscript

## LUNG FUNCTION and ASTHMA in POOL ENVIRONMENTS

in lung lavage fluid occur in several lung disorders, probably due to a decrease in the production of CC16 as a consequence of a depletion of Clara cells [16+7]. We found a statistically significant difference in the serum level of CC16 between pool workers compared to volunteers. This finding is consistent with our previous finding of a lower CC16 value in school children frequently attending indoor swimming pools than in those with a low attendance at such pools [5]. The difference between workers and previously unexposed healthy volunteers may be due to the older age of the workers but is more likely due to repeated exposures because a similar ~~like the~~ difference occurred among school children and all these differences may be due to a depletion of Clara cells. We did not find any statistically significant exposure-related changes in concentrations of the biomarkers of pulmonary epithelial integrity (CC16 and SPD) after exposure to pool air for 2 hours. The lack of such an exposure-related change was probably due to the relatively short exposure duration and low exposure level of  $\text{NCl}_3$ . Another possible explanation is that  $\text{NCl}_3$  acts preferentially in the more proximal parts of the respiratory tract, inducing a mild constriction of the central airways, but with less interference in the terminal bronchioles, where the Clara cells are located. In previous studies of volunteers exposed to ozone [6], we found both a decrease in  $\text{FEV}_1$  and an increase in serum CC16 concentrations after exposure.

Ideally, all exposures should have been performed at the same hour, because it is known that CC16 has diurnal variation [12]. However, for practical reasons exposures were started at somewhat different times during the day and aAll CC16 values in the present study were corrected for diurnal variation [12].Such correction is essential, but introduces a certain element of uncertainty. In spite of such correction, there was a statistically significant decrease with time of experiment from 0 h to 8 h in group A (regardless of exposure to  $\text{NCl}_3$ ). This indicates that the real diurnal variation exceeded the one assumed in the employed

## LUNG FUNCTION and ASTHMA in POOL ENVIRONMENTS

correction calculation. For group B there is an opposite trend with time, possibly related to an inadequate correction of the values in this group. The pool workers were older and had been more exposed to  $\text{NCl}_3$  during many years of work in pool environments. ~~Data on diurnal variation for SPD are not available in the literature.~~ Our data on SPD, with a statistically significant decrease with time between 0 h and 8 h, confirm previously reported [17] indicate that a diurnal variation exists.

The absence of exposure-related effects (after 2 hours exposure) on serum concentrations of CC16 and SPD in combination with small, statistically significant decreases in  $\text{FEV}_1$  and  $\text{FEV}_\%$  show that the 2-hour exposure level in this experiment can be regarded as the Lowest-Observed-Adverse-Effect-Level on the lung for this group of volunteers. It should be borne in mind that individuals with increased sensitivity to adverse respiratory effects, like those with pre-existing asthma, were not included in the present study. Our observation may be of use in relation to administrative action in setting exposure limits for  $\text{NCl}_3$ . To our knowledge, no health-based limit values for occupational or environmental exposures have yet been set for  $\text{NCl}_3$ . A technical value of  $0.2 \text{ mg/m}^3$  was recently recommended in Germany [18]. Bernard et al 2006 [19] showed that serum total IgE was a factor determining the risk of adverse pulmonary effects after exposure to pool environments. Serum levels of total IgE in the volunteers and workers of our study were ~~lower than among mild asthmatics.~~ The absence of an increased level of total serum IgE among the present volunteers indicates that individuals with possibly increased sensitivity due to increased IgE had been successfully excluded. Further studies on persons with elevated serum IgE would be of interest. Another group that may suffer respiratory effects at lower air concentrations of  $\text{NCl}_3$  is competitive swimmers because their breathing volumes exceed those of the volunteers in the present study. Helenius et al 1998 [20] found increased respiratory symptoms and bronchial responsiveness in elite swimmers.

## LUNG FUNCTION and ASTHMA in POOL ENVIRONMENTS

Our study indicates that employees in Swedish indoor pools are exposed to approximately the same level of  $\text{NCl}_3$  as employees in France and Belgium. We found median  $\text{NCl}_3$  concentrations of  $0.18 \text{ mg/m}^3$  (mean  $0.21 \text{ mg/m}^3$ ) in ten different premises, while Hery et al 1995 [9] reported  $0.14\text{-}0.91 \text{ mg/m}^3$  and Massin et al [3] reported a mean of  $0.24 \text{ mg/m}^3$  in Public pool environments and  $0.67 \text{ mg/m}^3$  in establishments with private owners. There are no previous published data on  $\text{NCl}_3$  exposure in Swedish indoor pools. The work environment, i.e. ventilation and the use of sodium hypochlorite as disinfectant has probably not changed during the past decades. This makes it reasonable to estimate that pool workers have been exposed to  $\text{NCl}_3$  at approximately the same levels as reported in this study.

In the epidemiological part of the present study, we found a statistically significant relationship between the number of hours spent in swimming pool environments and the ~~percentage of workers reporting acute incidence of symptoms when working.~~ The ~~percentage varied workers reported a high incidence of respiratory and mucous irritation symptoms~~ from 13 percent for dyspnoea to 37 percent for eye irritation. These findings are in accordance with previous observations in France [3] and Holland [1]. ~~These are subjective symptoms reported in a questionnaire also collecting exposure information and there is a possibility for recall bias. However similar clear outcomes have been reported also in other studies [1,3].~~

~~This study also found a higher prevalence of self reported asthma in swimming pool workers than in a reference group. This difference remained when adjusted for age and sex, but failed to reach statistical significance ( $p = 0.11$ ).~~ Our nested case-referent study found an Odds Ratio (OR) for asthma of 2.53 (95% CI 0.89 – 7.19) for workers with more extensive exposure in pool areas (exposure level 2 compared to persons with exposure level 0 or 1). After correction

Formatted: Superscript

## LUNG FUNCTION and ASTHMA in POOL ENVIRONMENTS

for heredity the corresponding numbers were: OR 2.31 (95% CI 0.79 - 6.74). These values refer to cases of self-reported asthma occurring after they started to work in swimming-pool environments, compared to controls without asthma.

Cases of asthma in pool workers have been reported in the United Kingdom [8], but no epidemiological evidence has been reported. The findings of the present study did not reach statistical significance and provide only limited support for a causal relationship between asthma and work at indoor swimming pools [Individuals who are fit for these type of jobs tend to exercise more regularly and may notice respiratory symptoms; this may contribute to confounding.](#) ~~T-However,~~ the fact that there was a tendency towards a decreasing risk of asthma in workers with longer work history may indicate a healthy worker effect due to the irritating properties of  $\text{NCl}_3$  in pool environments. ~~A~~ recent study [21] reported a higher prevalence (4.5%) of new-onset asthma among recreational swimmers with >320 hours of cumulative pool attendance compared to 0.4% among swimmers with <320 hours of pool attendance, thus supporting a role for exposure at chlorinated pools for development of asthma. In children engaged in recreational swimming, a statistically significant relationship was shown between cumulative attendance at indoor swimming pools and the probability of developing asthma in those with increased total IgE in serum [13,14,19]. Attendance at chlorinated pools before the age of 2 years increased the risk of bronchiolitis and asthma [22]

The present findings support the previously advanced hypothesis [7, 13,14, 19,21] that exposures to  $\text{NCl}_3$  levels commonly occurring in indoor swimming pool environments can cause acute airway and mucosal symptoms as well as changes in lung function and deterioration of asthma.

## LUNG FUNCTION and ASTHMA in POOL ENVIRONMENTS

**Conclusions:** For the first time in adults, statistically significant but small decreases in lung function were found in both previously unexposed subjects and pool workers after exposure to pool air containing 0.23 and 0.14 mg/m<sup>3</sup> respectively, of NCl<sub>3</sub> compared to filtered air. The changes in lung function occurred in adults without any signs of allergy and with low IgE values. In a cohort of pool workers we found exposure-related acute mucous membrane and respiratory symptoms. An increased odds ratio for asthma (OR 2.31, 95% CI 0.79-6.74) was indicated in workers in the highest exposure category compared to lower exposures. Our observations give support to a previously advanced hypothesis that current exposures to NCl<sub>3</sub> can cause adverse effects on mucous membranes and lungs of humans and contribute to the development of asthma. Further research in sensitive groups is warranted.

**Data sharing:** There is no additional data available

**Acknowledgements:** This work was supported by the Swedish Council for Working Life and Social Research (FAS) project 2004-0497 and the Swedish Research Council for Environment, Agricultural Sciences and Spatial Planning (FORMAS) project 2005-1561. The authors declare no competing interests.

## Author's affiliations

G. Nordberg, N-G Lundstrom, B. Forsberg, A Hagenbjork-Gustafsson, B. J-son Lagerkvist,  
M. Svensson, L. Nilsson, H. Bertilsson and Kåre Eriksson:

Department of Public Health and Clinical Medicine, Occupational and Environmental  
Medicine, Umea University, Umea, Sweden;

A. Blomberg:

1  
2  
3  
4 LUNG FUNCTION and ASTHMA in POOL ENVIRONMENTS  
5

6 Department of Public Health and Clinical Medicine, Medicine/Respiratory Medicine, Umea  
7 University, Umea, Sweden.  
8

9  
10 L. Nilsson:

11 Department of Mathematical Statistics, Umea University, Umea, Sweden.  
12

13  
14 A. Bernard, X. Dumont:

15  
16 Unit of Industrial Toxicology and Occupational Health, Catholic University of Louvain,  
17 Brussels, Belgium  
18  
19

20  
21  
22  
23  
24  
25  
26  
27  
28 **References**

29  
30 1. Jacobs J H, Spaan S, van Rooy GB et al. Exposure to trichloramine and respiratory symptoms  
31 in indoor swimming pool workers. *Eur Respir J.* 2007 ; 29: 690-698.  
32

33  
34  
35 2. Bowen AB, Kile JC, Otto C et al. Outbreaks of short-incubation ocular and respiratory  
36 illness following exposure to indoor swimming pools. *Environ Health Perspect* 2007; 115 :  
37 267-71.  
38  
39

40  
41  
42  
43 3. Massin N, Bohadana AB, Wild P et al. Respiratory symptoms and bronchial responsiveness  
44 in lifeguards exposed to nitrogen trichloride in indoor swimming pools. *Occup Environ Med*  
45 1998; 55: 258-263.  
46  
47  
48  
49  
50  
51  
52  
53  
54  
55  
56



## LUNG FUNCTION and ASTHMA in POOL ENVIRONMENTS

4.. Carbonnelle S, Francaux M, Doyle I et al. Changes in serum pneumoproteins caused by short-term exposures to nitrogen trichloride in indoor chlorinated swimming pools.

*Biomarkers*, 2002 ;7 :464-478.

5.. Carbonnelle S, Bernard A, Doyle IR, et al. Fractional exhaled NO and serum pneumoproteins after swimming in a chlorinated pool. *Med Sci Sports Exerc*. 2008 ;40:1472-6.

Formatted: No underline, Font color: Auto

6. Blomberg A, Mudway I, Svensson M et al. Clara cell protein as a biomarker for ozone – induced lung injury in humans. *Eur Respir J*. 2003 ;22 :883-888.

7.. Lagerkvist BJ, Bernard A, Blomberg A et al.. Pulmonary epithelial integrity in children : relationship to ambient ozone exposure and swimming pool attendance. *Environ Health Perspect* 2004; 112: 1768-1771.

8. Thickett KM, McCord JS, Gerber JM et al. Occupational Asthma caoused by Chloramines in indoor swimming-pool air. *Eur Respir J* 2002 ;19 :827-32

9. Hery M, Hecht G, Gerber JM et al. Exposure to chloramines in the atmosphere of indoor swimming pools. *Ann Occup Hyg* 1995; 39:427-439.

10. Bernard A, Marchandise FX, Depelchin S et al Clara cell protein in serum and bronchalveolar lavage. *Eur Resp J*. 1992 ; 5 :1231-1238.

11. Hermans C, Aly O, Nyberg BI et al. Determinants of Clara cell protein (CC16) concentration in serum: a reassessment with two different immunoassays. *Clin Chim Acta* 1998 ; 272: 101-110.

## LUNG FUNCTION and ASTHMA in POOL ENVIRONMENTS

12. Helleday R, Segerstedt B, Forsberg B et al. Exploring the time dependence of serum Clara cell protein as a biomarker of pulmonary injury in humans. *Chest*, 2006 ; 130: 672-675.

~~13. Torén K, Gislason T, Omenaas E et al. A prospective study of asthma incidence and its predictors : the RHINE study. *Eur Respir J* 2004 ; 24 : 942-946~~

~~13~~14. Bernard A, Carbonelle S, Michel O et al. Lung hyperpermeability and asthma prevalence in schoolchildren : unexpected associations with the attendance at indoor chlorinated swimming pools. *Occup Environ Med* 2003 ;60 :385-94.

~~14~~14. Hermans C, Bernard A. Clara cell protein: characteristics and potential applications as marker of lung toxicity. *Biomarkers* 1996; 1:3-8.

~~15~~15. Broeckaert F, Arsalane K, Hermans C et al. Lung epithelial damage at low concentrations of ambient ozone. *Lancet* 1999; 353:900-901.

~~16~~16. Hermans C and Bernard A State of the Art. Lung Epithelium-specific Proteins. Characteristics and potential applications as markers. *Am J Respir Crit Care Med* 1999; 159:646-678.

~~17~~17. Hoegh SV, Sorensen GL, Tornoe I et al. Long-term stability and circadian variation in circulating levels of surfactant protein D. *Immunobiology*.2010. 215:314-320.

Formatted: Font: Italic, No underline

## LUNG FUNCTION and ASTHMA in POOL ENVIRONMENTS

18.:German Working Group on Indoor Guide Values of the Federal Environment Agency,  
Risk assessment of trichloramine in the air of indoor swimming pools. *Bundesgesundheitsbl.*  
2011 ; 54 :997 -1004 [in German with abstract in English]

19. Bernard A, Carbonnelle S, De Burbure C et al. Chlorinated pool attendance, atopy, and  
the risk of asthma during childhood. *Environ Health Perspect* 2006 ;114 : 1567-73.

20. Helenius IJ, Tikkanen HO, Sarna S et al. Astma and increased bronchial responsiveness  
in elite athletes: atopy and sports event as risk factors. *J Allergy Clin Immunol* 1998,  
101, 646-52

Formatted: No underline, Font color: Auto, English (U.S.)

21. Ferrari M, Schenk K, Mantovani W et al. Attendance at chlorinated indoor pools and risk  
of asthma in adult recreational swimmers. *J Sci Med Sport*, 2011; 14: 184-189.

Formatted: No underline, Font color: Auto

22. Viosin C, Sardella A, Marcucci F et al. Infant swimming in chlorinated pools and the risk  
of bronchiolitis, asthma and allergy. *Eur. Resp J* 2010 ; 36 : 41-47

## LUNG FUNCTION and ASTHMA in POOL ENVIRONMENTS

## Figures and Tables

**Table 1.** Healthy volunteers (n=37): FEV<sub>1</sub> (forced expiratory volume, liter during 1 sec) and FEV<sub>1</sub>% (FEV<sub>1</sub> × 100/forced vital capacity) measured before and after 2h exercise in filtered air and pool air respectively. Mean ± SD. Mean differences (before-after) within parentheses.

[Separate file]

Formatted: English (U.S.)

**Table 1.** Healthy volunteers (n=37): FEV<sub>1</sub> (forced expiratory volume, liter during 1 sec) and FEV<sub>1</sub>% (FEV<sub>1</sub> × 100/forced vital capacity) measured before and after 2h exercise in filtered and pool air respectively. Mean ± SD. Mean differences (before after) within parentheses.

| Expiratory volume  | Exposure in filtered air |             |                       | Exposure in pool air |             |                       |
|--------------------|--------------------------|-------------|-----------------------|----------------------|-------------|-----------------------|
|                    | before                   | after       | mean diff<br>Δ values | before               | after       | mean diff<br>Δ values |
| FEV <sub>1</sub>   | 4.10 ± 0.85              | 4.11 ± 0.87 | (-0.01) <sup>o</sup>  | 4.14 ± 0.87          | 4.09 ± 0.86 | (-0.05)**             |
| FEV <sub>1</sub> % | 80.5 ± 5.8               | 80.9 ± 5.2  | (-0.4) <sup>o</sup>   | 80.7 ± 5.3           | 79.9 ± 5.3  | (-0.8)*               |

\*\*FEV<sub>1</sub> significantly lower after exposure to pool air, p = 0.01

\*FEV<sub>1</sub>% lower after exposure to pool air, p = 0.05

<sup>o</sup>difference not statistically significant

The FEV<sub>1</sub> Δ values were -0.01 liter/sec in filtered air and 0.05 liter/sec in pool air, difference statistically significant, p = 0.01 (paired t test).

Paired t test of the difference in FEV<sub>1</sub>% Δ value in filtered air (mean -0.4 %) as compared pool's air (mean 0.8 %) was statistically significant, p = 0.004.

**Table 2.** Swimming-pool workers (n=14): FEV<sub>1</sub> (forced expiratory volume, liter during 1 sec) and FEV<sub>1</sub>% (FEV<sub>1</sub> × 100/forced vital capacity) measured before and after 2h exercise in filtered air and pool air respectively. Mean ± SD. Mean differences (before after) within parentheses.

| Expiratory volume | Exposure in filtered air |       |                       | Exposure in pool air |       |                       |
|-------------------|--------------------------|-------|-----------------------|----------------------|-------|-----------------------|
|                   | before                   | after | mean diff<br>Δ values | before               | after | mean diff<br>Δ values |

## LUNG FUNCTION and ASTHMA in POOL ENVIRONMENTS

|                        |                        |                         |                               |                        |                        |                                |
|------------------------|------------------------|-------------------------|-------------------------------|------------------------|------------------------|--------------------------------|
| <b>FEV<sub>1</sub></b> | <del>3.56 ± 0.99</del> | <del>3.51 ± 0.91</del>  | <del>(0.05)<sup>°</sup></del> | <del>3.59 ± 0.93</del> | <del>3.57 ± 0.92</del> | <del>(0.014)<sup>°</sup></del> |
| <b>FEV%</b>            | <del>78.86 ± 6.3</del> | <del>78.43 ± 5.42</del> | <del>(0.43)<sup>°</sup></del> | <del>79.1 ± 4.1</del>  | <del>77.8 ± 5.1</del>  | <del>(1.36)*</del>             |

\*FEV% lower after exposure to pool air,  $p = 0.003$  (Wilcoxon signed rank test).

<sup>°</sup> indicates no statistically significant difference

**Table 2.** Swimming pool workers (n=14): FEV<sub>1</sub> (forced expiratory volume, liter during 1 sec) and FEV% (FEV<sub>1</sub> × 100 / forced vital capacity) measured before and after 2h exercise in filtered air and pool air respectively. Mean ± SD. Mean differences (before-after) within parentheses.

[\[Separate file\]](#)

Formatted: English (U.S.)

### Figure legends

Figure 1: Mean values (µg/L) and SD for CC16corr at various time points before (0h), immediately after exposure (2h) and the following 2 (4h), 4 (6h) and 6 hours (8h). Values are shown for the previously unexposed group of healthy volunteers (A) after exposure in a pool environment, after exposure to filtered air (two upper set of lines and bars). The two lower lines and related bars represent exposure in pool environment and filtered air for Group B, recruited among pool workers with several years exposure to pool environments.

Figure 2: Mean and SD for measured SPD values (µg/L) at various time points (0-8 hours) of the study. Exposure to pool environment or filtered air took place for 2 hours (between 0h and 2h). Group A: previously unexposed healthy volunteers. Group B: pool workers

Fig 1 (separate file)

Fig 2(separate file)

1  
2  
3  
4 LUNG FUNCTION and ASTHMA in POOL ENVIRONMENTS  
5  
6  
7  
8  
9  
1011  
12 **Statement:**  
13

14 The Corresponding Author has the right to grant on behalf of all authors and does grant on  
15 behalf of all authors, an exclusive license (or non-exclusive for government employees) on a  
16 worldwide basis to the BMJ Group and co-owners or contracting owning societies (where  
17 published by the BMJ Group on their behalf), and its Licensees to permit this article (if  
18 accepted) to be published in Occupational and Environmental Medicine and any other BMJ  
19 Group products and to exploit all subsidiary rights, as set out in our license.”  
20  
21  
22  
23

24 **Contributorship statement:**

25 "The contributions of the authors are as follows: G.Nordberg 1,2,3; N-G.Lundstrom 1,2,3;  
26 B.Forsberg1,2,3; A.Hagenbjork-Gustafsson1,2,3; B. J-son Lagerkvist1,2,3; J. Nilsson1,2,3;  
27 M.Svensson1,2,3; A.Blomberg1, 2,3; L. Nilsson1,2,3; A. Bernard1,2,3; X. Dumont1,2,3;  
28 H.Bertilsson1,2,3 and K. Eriksson1,2,3.

29 1) substantial contributions to conception and design, acquisition of data, or analysis and  
30 interpretation of data; 2) drafting the article or revising it critically for important intellectual  
31 content; and 3) final approval of the version to be published."  
32  
33  
34  
35  
36  
37  
38  
39  
40  
41  
42  
43  
44  
45  
46  
47  
48  
49  
50  
51  
52  
53  
54  
55  
56  
57  
58  
59  
60

**Table 1.** Healthy volunteers (n=37): FEV<sub>1</sub> (forced expiratory volume, liter during 1 sec) and FEV% (FEV<sub>1</sub> × 100 / forced vital capacity) measured before and after 2h exercise in filtered air and pool air respectively. Mean ± SD. Mean differences (before-after) within parentheses.

| Expiratory volume      | Exposure in filtered air |             |                        | Exposure in pool air |             |                        | Difference in changes <sup>‡</sup> |
|------------------------|--------------------------|-------------|------------------------|----------------------|-------------|------------------------|------------------------------------|
|                        | before                   | after       | mean diff<br>Δ -values | before               | after       | mean diff<br>Δ -values |                                    |
| <b>FEV<sub>1</sub></b> | 4.10 ± 0.85              | 4.11 ± 0.87 | (-0.01) <sup>°</sup>   | 4.14 ± 0.87          | 4.09 ± 0.86 | (0.05) **              | p=0.01                             |
| <b>FEV%</b>            | 80.5 ± 5.8               | 80.9 ± 5.2  | (-0.4) <sup>°</sup>    | 80.7 ± 5.3           | 79.9 ± 5.3  | (0.8)*                 | p=0.004                            |

\*\* FEV<sub>1</sub> significantly lower after exposure in pool air, p=0.01

\*FEV% lower after exposure to pool air, p = 0.05

<sup>°</sup> indicates no statistically significant difference

<sup>‡</sup> statistical significance of difference between Δ -values in filtered air and in pool air

**Table 2.** Swimming pool workers (n=14): FEV<sub>1</sub> (forced expiratory volume, liter during 1 sec) and FEV% (FEV<sub>1</sub>x100/forced vital capacity) measured before and after 2h exercise in filtered air and pool air respectively. Mean  $\pm$  SD. Mean differences (before-after) within parentheses.

| Expiratory volume | Exposure in filtered air |                  |                               | Exposure in pool air |                 |                               | Difference in changes <sup>‡</sup> |
|-------------------|--------------------------|------------------|-------------------------------|----------------------|-----------------|-------------------------------|------------------------------------|
|                   | before                   | after            | mean diff<br>$\Delta$ -values | before               | after           | mean diff<br>$\Delta$ -values |                                    |
| FEV <sub>1</sub>  | 3.56 $\pm$ 0.99          | 3.51 $\pm$ 0.91  | (0.05) <sup>°</sup>           | 3.59 $\pm$ 0.93      | 3.57 $\pm$ 0.92 | (0.014) <sup>°</sup>          | Non-significant                    |
| FEV%              | 78.86 $\pm$ 6.3          | 78.43 $\pm$ 5.42 | (0.43) <sup>°</sup>           | 79.1 $\pm$ 4.1       | 77.8 $\pm$ 5.1  | (1.36)*                       | Non-significant                    |

\*FEV% lower after exposure to pool air, p = 0.003 (Wilcoxon signed rank test).

<sup>°</sup> indicates no statistically significant difference

<sup>‡</sup>Statistical significance of difference between  $\Delta$  -values in filtered air and pool air



1  
2  
3  
4  
5  
6  
7  
8  
9  
10  
11  
12  
13  
14  
15  
16  
17  
18  
19  
20  
21  
22  
23  
24  
25  
26  
27  
28  
29  
30  
31  
32  
33  
34  
35  
36  
37  
38  
39  
40  
41  
42  
43  
44  
45  
46  
47

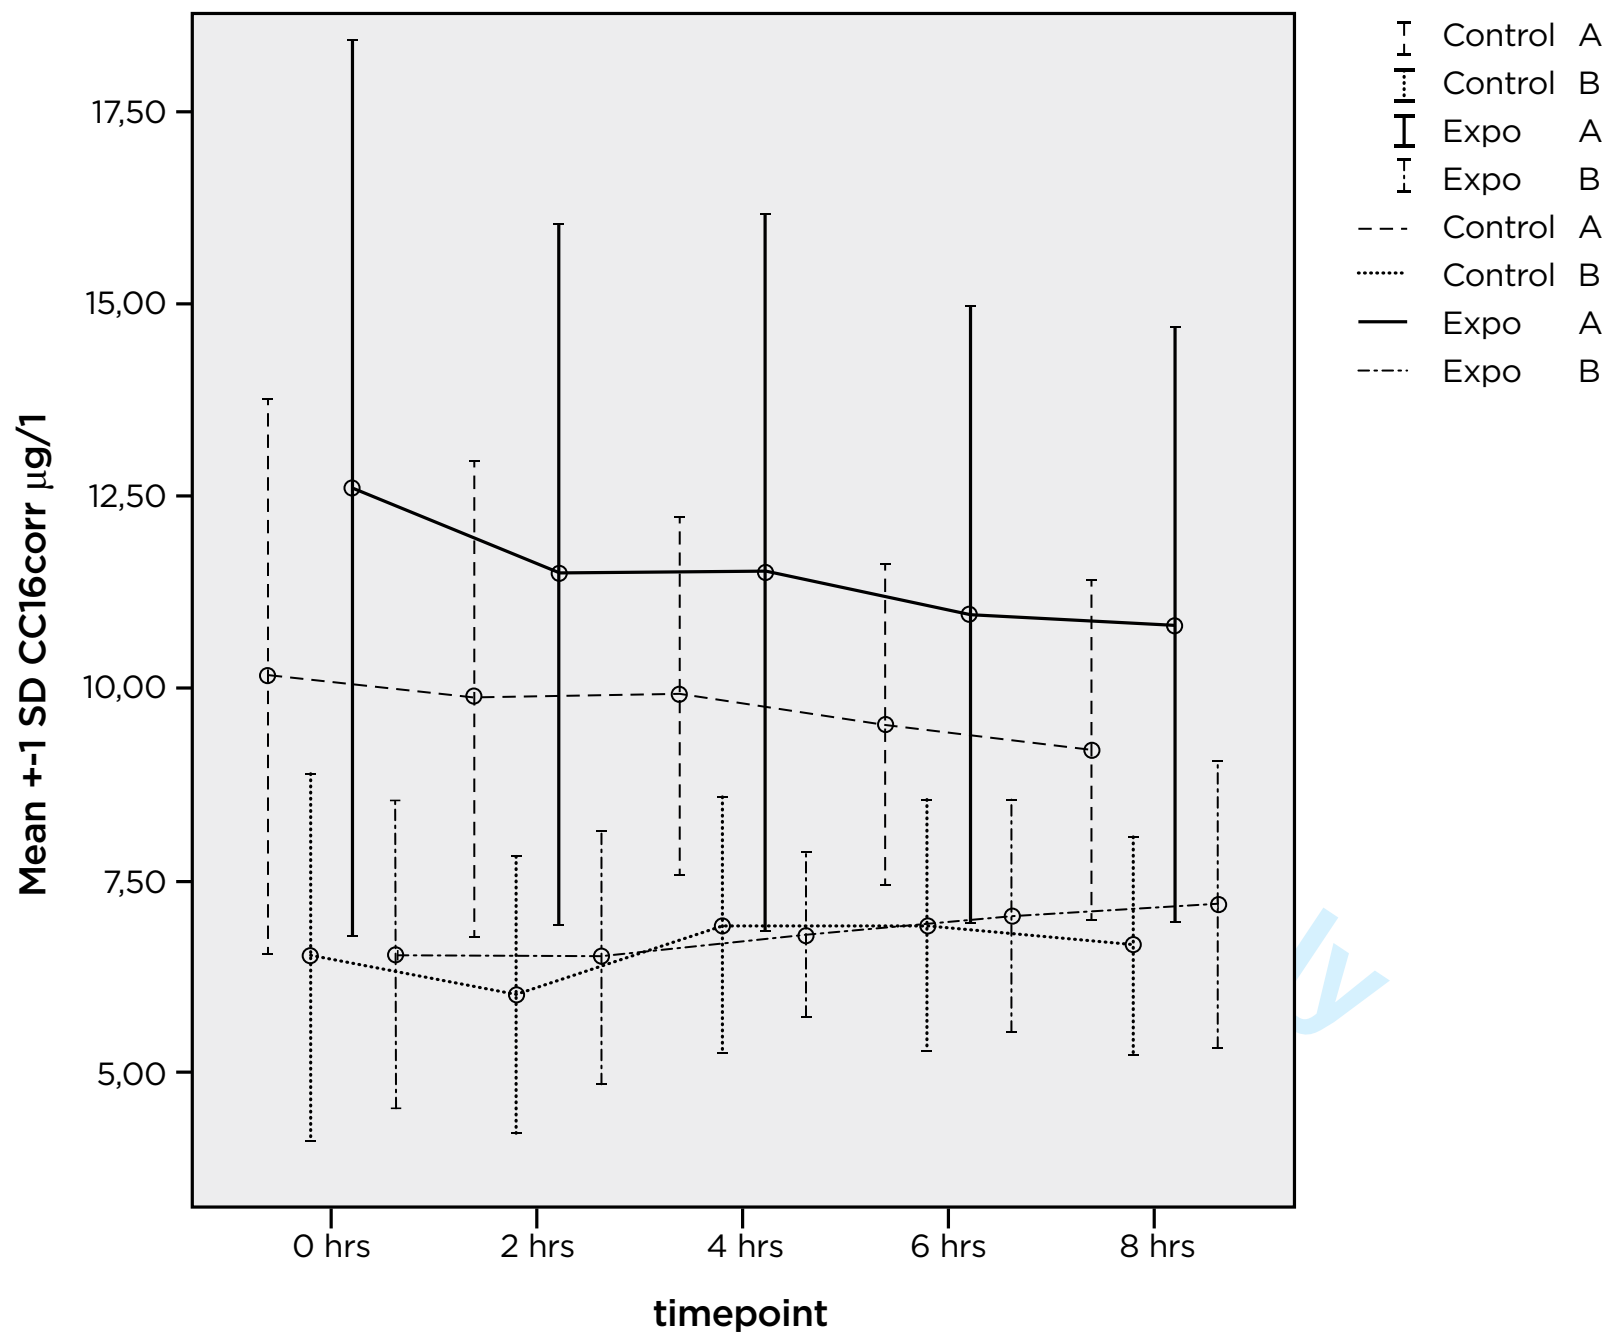



1  
2  
3  
4  
5  
6  
7  
8  
9  
10  
11  
12  
13  
14  
15  
16  
17  
18  
19  
20  
21  
22  
23  
24  
25  
26  
27  
28  
29  
30  
31  
32  
33  
34  
35  
36  
37  
38  
39  
40  
41  
42  
43  
44  
45  
46  
47

## STROBE Statement—checklist of items that should be included in reports of observational studies

|                              | Item No | Recommendation                                                                                                                                                                                                                                                                                                                                                                                                                                                                                                                                                                                                                                                                                   |
|------------------------------|---------|--------------------------------------------------------------------------------------------------------------------------------------------------------------------------------------------------------------------------------------------------------------------------------------------------------------------------------------------------------------------------------------------------------------------------------------------------------------------------------------------------------------------------------------------------------------------------------------------------------------------------------------------------------------------------------------------------|
| <b>Title and abstract</b>    | 1       | (a) Indicate the study's design with a commonly used term in the title or the abstract<br>(b) Provide in the abstract an informative and balanced summary of what was done and what was found                                                                                                                                                                                                                                                                                                                                                                                                                                                                                                    |
| <b>Introduction</b>          |         |                                                                                                                                                                                                                                                                                                                                                                                                                                                                                                                                                                                                                                                                                                  |
| Background/rationale         | 2       | Explain the scientific background and rationale for the investigation being reported                                                                                                                                                                                                                                                                                                                                                                                                                                                                                                                                                                                                             |
| Objectives                   | 3       | State specific objectives, including any prespecified hypotheses                                                                                                                                                                                                                                                                                                                                                                                                                                                                                                                                                                                                                                 |
| <b>Methods</b>               |         |                                                                                                                                                                                                                                                                                                                                                                                                                                                                                                                                                                                                                                                                                                  |
| Study design                 | 4       | Present key elements of study design early in the paper                                                                                                                                                                                                                                                                                                                                                                                                                                                                                                                                                                                                                                          |
| Setting                      | 5       | Describe the setting, locations, and relevant dates, including periods of recruitment, exposure, follow-up, and data collection                                                                                                                                                                                                                                                                                                                                                                                                                                                                                                                                                                  |
| Participants                 | 6       | (a) <i>Cohort study</i> —Give the eligibility criteria, and the sources and methods of selection of participants. Describe methods of follow-up<br><i>Case-control study</i> —Give the eligibility criteria, and the sources and methods of case ascertainment and control selection. Give the rationale for the choice of cases and controls<br><i>Cross-sectional study</i> —Give the eligibility criteria, and the sources and methods of selection of participants<br>(b) <i>Cohort study</i> —For matched studies, give matching criteria and number of exposed and unexposed<br><i>Case-control study</i> —For matched studies, give matching criteria and the number of controls per case |
| Variables                    | 7       | Clearly define all outcomes, exposures, predictors, potential confounders, and effect modifiers. Give diagnostic criteria, if applicable                                                                                                                                                                                                                                                                                                                                                                                                                                                                                                                                                         |
| Data sources/<br>measurement | 8*      | For each variable of interest, give sources of data and details of methods of assessment (measurement). Describe comparability of assessment methods if there is more than one group                                                                                                                                                                                                                                                                                                                                                                                                                                                                                                             |
| Bias                         | 9       | Describe any efforts to address potential sources of bias                                                                                                                                                                                                                                                                                                                                                                                                                                                                                                                                                                                                                                        |
| Study size                   | 10      | Explain how the study size was arrived at                                                                                                                                                                                                                                                                                                                                                                                                                                                                                                                                                                                                                                                        |
| Quantitative variables       | 11      | Explain how quantitative variables were handled in the analyses. If applicable, describe which groupings were chosen and why                                                                                                                                                                                                                                                                                                                                                                                                                                                                                                                                                                     |
| Statistical methods          | 12      | (a) Describe all statistical methods, including those used to control for confounding<br>(b) Describe any methods used to examine subgroups and interactions<br>(c) Explain how missing data were addressed<br>(d) <i>Cohort study</i> —If applicable, explain how loss to follow-up was addressed<br><i>Case-control study</i> —If applicable, explain how matching of cases and controls was addressed<br><i>Cross-sectional study</i> —If applicable, describe analytical methods taking account of sampling strategy<br>(e) Describe any sensitivity analyses                                                                                                                                |

Continued on next page

1  
2  
3  
4  
5  
6  
7  
8  
9  
10  
11  
12  
13  
14  
15  
16  
17  
18  
19  
20  
21  
22  
23  
24  
25  
26  
27  
28  
29  
30  
31  
32  
33  
34  
35  
36  
37  
38  
39  
40  
41  
42  
43  
44  
45  
46  
47  
48  
49  
50  
51  
52  
53  
54  
55  
56  
57  
58  
59  
60

## Results

|                  |     |                                                                                                                                                                                                                                                                                                                                                                                                               |
|------------------|-----|---------------------------------------------------------------------------------------------------------------------------------------------------------------------------------------------------------------------------------------------------------------------------------------------------------------------------------------------------------------------------------------------------------------|
| Participants     | 13* | (a) Report numbers of individuals at each stage of study—eg numbers potentially eligible, examined for eligibility, confirmed eligible, included in the study, completing follow-up, and analysed<br>(b) Give reasons for non-participation at each stage<br>(c) Consider use of a flow diagram                                                                                                               |
| Descriptive data | 14* | (a) Give characteristics of study participants (eg demographic, clinical, social) and information on exposures and potential confounders<br>(b) Indicate number of participants with missing data for each variable of interest<br>(c) <i>Cohort study</i> —Summarise follow-up time (eg, average and total amount)                                                                                           |
| Outcome data     | 15* | <i>Cohort study</i> —Report numbers of outcome events or summary measures over time<br><i>Case-control study</i> —Report numbers in each exposure category, or summary measures of exposure<br><i>Cross-sectional study</i> —Report numbers of outcome events or summary measures                                                                                                                             |
| Main results     | 16  | (a) Give unadjusted estimates and, if applicable, confounder-adjusted estimates and their precision (eg, 95% confidence interval). Make clear which confounders were adjusted for and why they were included<br>(b) Report category boundaries when continuous variables were categorized<br>(c) If relevant, consider translating estimates of relative risk into absolute risk for a meaningful time period |
| Other analyses   | 17  | Report other analyses done—eg analyses of subgroups and interactions, and sensitivity analyses                                                                                                                                                                                                                                                                                                                |

## Discussion

|                  |    |                                                                                                                                                                            |
|------------------|----|----------------------------------------------------------------------------------------------------------------------------------------------------------------------------|
| Key results      | 18 | Summarise key results with reference to study objectives                                                                                                                   |
| Limitations      | 19 | Discuss limitations of the study, taking into account sources of potential bias or imprecision. Discuss both direction and magnitude of any potential bias                 |
| Interpretation   | 20 | Give a cautious overall interpretation of results considering objectives, limitations, multiplicity of analyses, results from similar studies, and other relevant evidence |
| Generalisability | 21 | Discuss the generalisability (external validity) of the study results                                                                                                      |

## Other information

|         |    |                                                                                                                                                               |
|---------|----|---------------------------------------------------------------------------------------------------------------------------------------------------------------|
| Funding | 22 | Give the source of funding and the role of the funders for the present study and, if applicable, for the original study on which the present article is based |
|---------|----|---------------------------------------------------------------------------------------------------------------------------------------------------------------|

\*Give information separately for cases and controls in case-control studies and, if applicable, for exposed and unexposed groups in cohort and cross-sectional studies.

**Note:** An Explanation and Elaboration article discusses each checklist item and gives methodological background and published examples of transparent reporting. The STROBE checklist is best used in conjunction with this article (freely available on the Web sites of PLoS Medicine at <http://www.plosmedicine.org/>, Annals of Internal Medicine at <http://www.annals.org/>, and Epidemiology at <http://www.epidem.com/>). Information on the STROBE Initiative is available at [www.strobe-statement.org](http://www.strobe-statement.org).
